1 **The lncRNA *APOLO* interacts with the transcription factor *WRKY42* to trigger root hair cell expansion in**  
2 **response to cold**

3  
4 Michaël Moison<sup>\*1</sup>, Javier Martínez Pacheco<sup>\*2</sup>, Leandro Lucero<sup>\*1</sup>, Camille Fonouni-Farde<sup>1</sup>, Johan  
5 Rodríguez-Melo<sup>3</sup>, Natanael Mansilla<sup>1</sup>, Aurélie Christ<sup>4</sup>, Jérémie Bazin<sup>4</sup>; Moussa Benhamed<sup>4</sup>; Fernando  
6 Ibañez<sup>3</sup>, Martin Crespi<sup>4</sup>, José M. Estevez<sup>†,2,5</sup> and Federico Ariel<sup>†1</sup>

7  
8 <sup>1</sup> Instituto de Agrobiotecnología del Litoral, Universidad Nacional del Litoral, CONICET, FBCB/FHUC,  
9 Centro Científico Tecnológico CONICET Santa Fe, Colectora Ruta Nacional No 168 km. 0, Paraje El Pozo,  
10 Santa Fe 3000, Argentina.

11 <sup>2</sup> Fundación Instituto Leloir and IIBBA-CONICET, Av. Patricias Argentinas 435, Buenos Aires CP C1405BWE,  
12 Argentina.

13 <sup>3</sup> Instituto de Investigaciones Agrobiotecnológicas, CONICET, Universidad Nacional de Río Cuarto, Río  
14 Cuarto 5800, Argentina.

15 <sup>4</sup> Institute of Plant Sciences Paris-Saclay (IPS2), CNRS, INRA, University Paris-Saclay and University of Paris  
16 Bâtiment 630, 91192 Gif sur Yvette, France.

17 <sup>5</sup> Centro de Biotecnología Vegetal (CBV), Facultad de Ciencias de la Vida (FCsV), Universidad Andres Bello,  
18 Santiago, Chile and Millennium Institute for Integrative Biology (iBio), Santiago, Chile.

19

20 \* These authors contributed equally to this work

21 † Correspondence to: Federico Ariel ([fariel@santafe-conicet.gov.ar](mailto:fariel@santafe-conicet.gov.ar)) and José M. Estevez  
22 ([jestevez@leloir.org.ar](mailto:jestevez@leloir.org.ar))

23

24 Text Word count (without Abstract and References): 6,475

25

26 **SUMMARY**

27 The lncRNA *APOLO* directly regulates the transcription of the root hair-master gene *RHD6*. In response to  
28 cold, *APOLO* is induced and it decoys the H3K27me3-binding protein LHP1 away from *RHD6*. In addition,  
29 *APOLO* modulates the binding of the transcription factor *WRKY42* to the *RHD6* promoter at low tempera-  
30 tures.

31

32 **ABSTRACT**

33  
34 Plant long noncoding RNAs (lncRNAs) have emerged as important regulators of chromatin dynamics,  
35 impacting on transcriptional programs leading to different developmental outputs. The lncRNA *AUXIN*  
36 *REGULATED PROMOTER LOOP* (*APOLO*) directly recognizes multiple independent loci across the  
37 *Arabidopsis* genome and modulates their three-dimensional chromatin conformation, leading to  
38 transcriptional shifts. Here, we show that *APOLO* recognizes the locus encoding the root hair (RH) master  
39 regulator ROOT HAIR DEFECTIVE 6 (*RHD6*) and controls *RHD6* transcriptional activity leading to cold-  
40 enhanced RH elongation through the consequent activation of the transcription factor gene *RHD6*-like  
41 *RSL4*. Furthermore, we demonstrate that *APOLO* interacts with the transcription factor *WRKY42* and  
42 modulates its binding to the *RHD6* promoter. *WRKY42* is required for the activation of *RHD6* by low  
43 temperatures and *WRKY42* deregulation impairs cold-induced RH expansion. Collectively, our results  
44 indicate that a novel ribonucleoprotein complex involving *APOLO* and *WRKY42* forms a regulatory hub  
45 which activates *RHD6* by shaping its epigenetic environment and integrates signals governing RH growth  
46 and development.

47  
48 **Words:** 159

49  
50 **Key words:** root hairs; long noncoding RNAs; *APOLO*; *RHD6*; *WRKY42*; cold temperature

## 51 INTRODUCTION

52

53 Root hairs (RHs) are single cell projections developed from specialized epidermal trichoblast cells  
54 able to increase their size several hundred times in a polar manner to reach and promote the uptake of  
55 water-soluble nutrients, interact with soil microorganisms and support anchor to the plant. The specifi-  
56 cation of epidermal cells into RHs is a complex process whose underlying mechanisms are partially un-  
57 derstood. In *Arabidopsis thaliana*, RH cell fate is controlled by a developmental program involving a  
58 complex of transcription factors (TFs) promoting the expression of the homeodomain protein GLABRA 2  
59 (GL2) (Ryu et al., 2005; Song et al., 2011; Schiefelbein et al., 2014; Balcerowicz et al., 2015). GL2 blocks  
60 RH development by inhibiting the transcription of the master regulator *ROOT HAIR DEFECTIVE 6 (RHD6)*  
61 (Lin et al., 2015). In the cells that differentiate into RHs (known as trichoblasts), a second TF complex  
62 suppresses *GL2* expression (Schiefelbein et al., 2014), forcing the cells to enter the RH cell fate program  
63 via the concomitant activation of *RHD6* along with downstream TFs (Menand et al., 2007; Pires et al.,  
64 2013). Briefly, *RHD6* together with its homolog *RSL1 (ROOT HAIR DEFECTIVE 6 LIKE 1)* induce the expres-  
65 sion of TFs from the bHLH family, including *RSL2 (ROOT HAIR DEFECTIVE 6 LIKE 2)* and *RSL4 (ROOT HAIR*  
66 *DEFECTIVE 6 LIKE 4)*, ultimately triggering the differentiation of the RHs and their subsequent polarized  
67 tip-growth (Karas et al., 2009; Yi et al., 2010; Bruex et al., 2012). In addition, it was proposed that *RSL4*  
68 controls the expression of a small subset of nearly 125 genes (Won et al., 2009; Yi et al., 2010; Datta et  
69 al., 2015; Vijayakumar et al., 2016), including several cell wall extensins (EXTs) (Ringli, 2010; Velasquez et  
70 al., 2011) sufficient to promote RH growth (Hwang et al., 2017).

71 RH expansion is regulated both by cell-intrinsic factors (e.g. endogenous phytohormones such as  
72 auxin) and external environmental signals (e.g. phosphate (Pi) availability in the soil) (Mangano et al.,  
73 2017; Bhosale et al., 2018). Pi starvation is one of the key environmental factors promoting rapid RH  
74 growth (Yi et al., 2010; Datta et al., 2015; Vijayakumar et al., 2016). In *Arabidopsis*, it triggers *RSL4* ex-  
75 pression via an enhanced auxin production, activating downstream effector genes mediating cell growth  
76 (Yi et al., 2010; Datta et al., 2015; Mangano et al., 2017; Marzol et al., 2017; Bhosale et al., 2018). Ac-  
77 cordingly, several auxin-related TFs have been implicated in Pi-starvation signaling in roots, including  
78 WRKY proteins that control the expression of the Pi transporter families Pi-permease *PHO1* and PHOS-  
79 PHATE TRANSPORTER (*PHT*) (Devaiah et al., 2007; Chen et al., 2009; Wang et al., 2014; Su et al., 2015).  
80 Under Pi-sufficient conditions, *WRKY6* and *WRKY42* bind to *W*-boxes of the *PHO1* promoter and suppress  
81 its expression. During Pi starvation, *WRKY42* is degraded by the 26S proteasome pathway, resulting in  
82 the activation of *PHO1* transcription (Chen et al., 2009; Su et al., 2015). In addition, *WRKY42* functions as

83 a positive regulator of *PHT1;1*, by binding to its promoter under Pi-sufficient condition (Su et al., 2015).  
84 Overall, WRKY42 is part of the components activating root early-responses to Pi starvation, although its  
85 role in controlling RH growth remains unexplored.

86 In recent years, plant long noncoding RNAs (lncRNAs) have emerged as important regulators of  
87 gene expression, and several among them, have been functionally linked to Pi homeostasis. For instance,  
88 the lncRNA *INDUCED BY PHOSPHATE STARVATION 1 (IPS1)* can sequester the Pi starvation-induced mi-  
89 croRNA miR-399, attenuating miR-399-mediated repression of *PHO2*, a gene encoding an E3 ligase af-  
90 fecting Pi uptake (Franco-Zorrilla et al., 2007). In addition, the *cis*-natural antisense (*cis*-NAT) transcript  
91 *PHO1;2*, induced under Pi deficiency, was shown to promote the translation of the *PHO1;2* mRNA in-  
92 volved in Pi loading into the xylem. The expression of this *cis*-NAT is associated with the transport of the  
93 sense–antisense RNA pair toward the polysomes (Jabnune et al., 2013). More recently, it was shown  
94 that the lncRNA *AUXIN REGULATED PROMOTER LOOP (APOLO)* recognizes multiple spatially independent  
95 genes by sequence complementarity and DNA-RNA duplex formation, known as R-loops. Upon recogni-  
96 tion, *APOLO* shapes the three-dimensional (3D) conformation of its target regions by decoying the Poly-  
97 comb Repressive Complex 1 (PRC1) component LIKE HETEROCHROMATIN PROTEIN 1 (LHP1), thereby  
98 regulating their transcription (Ariel et al., 2014; Ariel et al., 2020).

99 Here, we show that the lncRNA *APOLO* directly regulates a subset of genes involved in RH devel-  
100 opment, including the master regulator of RH initiation *RHD6*. *APOLO* activates *RHD6* transcription by  
101 modulating the formation of a local chromatin loop encompassing its promoter region, an epigenetic  
102 regulatory mechanism likely involving PRC1 and PRC2 components. Furthermore, we found that *APOLO*  
103 interacts with the TF WRKY42, forming a new hub that regulates *RHD6* to induce RH growth in response  
104 to low temperatures. RHD6-mediated induction of RH expansion likely occurs through the transcriptional  
105 activation of the TF-encoding gene *RSL4*, which emerged as a key factor in the response to cold.

106

## 107 RESULTS

108

### 109 ***APOLO* regulates root hair cell elongation in response to low temperatures**

110 Based on Chromatin Isolation by RNA Purification (ChIRP-Seq) performed in wild-type (WT, Col-0)  
111 plants, it was previously reported that the lncRNA *APOLO* recognizes a subset of independent loci en-  
112 riched in categories related to cell wall composition and organization (Ariel et al., 2020). A closer look at  
113 *APOLO bona fide* targets allowed us to identify seventeen genes involved in RH growth and expansion  
114 (**Supplementary Table 1**), a process dependent on cell wall remodeling molecules, including EXTs and

115 EXT-related proteins (Ringli, 2010; Lamport et al., 2011; Velasquez et al., 2011; Velasquez et al., 2015;  
116 Marzol et al., 2018). Interestingly, according to single-cell RNA-seq datasets (Zhang et al., 2019) *APOLO*  
117 transcripts are enriched in RH cells (**Supplementary Figure 1A**). Notably, sixteen *APOLO* direct targets  
118 were upregulated upon *APOLO* over-expression (**Supplementary Table 2**). Furthermore, 52 additional RH-  
119 related genes were upregulated in *35S:APOLO* seedlings (**Supplementary Table 2**) (Ariel et al., 2020).  
120 Among them, the RH central TFs *RHD6* (as a direct target), *RSL2* and *RSL4* (as indirectly regulated) were  
121 induced upon *APOLO* over-expression.

122 It was reported that the *APOLO* locus is targeted by the RNA-polymerase Pol V and silenced by  
123 RNA-directed DNA Methylation (RdDM, (Ariel et al., 2014)). A search in a small RNA-Seq performed in WT  
124 roots subjected to different temperature treatments (Gyula et al., 2018) revealed that RdDM-related 24nt  
125 siRNA accumulation over the *APOLO* locus is less abundant at low temperatures (**Supplementary Figure**  
126 **1B**), suggesting that *APOLO* transcription is regulated by cold. Accordingly, we found that *APOLO* tran-  
127 scriptional accumulation increases in roots after 24h at 10°C (**Figure 1A**). An analysis of the promoter  
128 activity of the 5.2kb region upstream *APOLO* (Ariel et al., 2020) directing the expression of a *GFP* reporter  
129 gene, additionally revealed a higher transcriptional activity at low temperatures in the RHs (**Figure 1B**).  
130 Strikingly, we observed that two RNAi-*APOLO* (repression of approximately 90%; Ariel et al., 2014) and  
131 *35S:APOLO* independent lines (over expression of 30-fold and 60-fold, respectively; Ariel et al., 2020)  
132 exhibit a basal increase of RH length at 22°C, and uncovered a strong induction of RH elongation in WT  
133 and RNAi-*APOLO* at 10°C, in contrast to *35S:APOLO* lines (**Figure 1C**). Accordingly, *RHD6* is induced in re-  
134 sponse to cold in WT roots, whereas RNAi-*APOLO* and *35S:APOLO* roots display higher *RHD6* basal levels  
135 than the WT (**Figure 1D**). Notably, *RHD6* transcript levels are not further induced by cold in *35S:APOLO*  
136 roots (**Figure 1D**), in agreement with the RH phenotype (**Figure 1C**). Collectively, our findings suggest that  
137 *APOLO* participates in the induction of cold-mediated RH elongation and a deregulation of *APOLO* tran-  
138 scription levels can impact RH growth.

139 Previous studies pointed out a key role of *RHD6* (together with *RSL1*) in RH development, which  
140 is mediated by *RSL4* and *RSL2* as downstream regulators of RH cell elongation (Menand et al., 2007; Pires  
141 et al., 2013). Notably, *RHD6*, *RSL2* and *RSL4* transcript levels were upregulated in *35S:APOLO* seedlings  
142 (**Supplementary Table 2**; (Ariel et al., 2020)), although only *RHD6* was identified as a direct target of  
143 *APOLO* (Ariel et al, 2020). In agreement with *RHD6* transcriptional behavior (**Figure 1D**), *RSL2* and *RSL4*  
144 basal transcript levels are higher in RNAi-*APOLO* and *35S:APOLO* compared to WT. Interestingly, *RSL2*  
145 and *RSL4* are induced by cold in WT and RNAi-*APOLO*, but not in *35S:APOLO* roots (**Supplementary Fig-**  
146 **ure 2A**), suggesting that low temperatures can activate these two genes still in the absence of *APOLO*

147 and bypassing RHD6 for RH expansion (**Figure 1C**). Thus, we assessed if these TFs were also controlling  
148 the promotion of RH growth by low temperatures. To this end, we tested how *rhdl6/rsll/rsll4* and *rsll2*,  
149 *rsll4* and double mutant plants *rsll2/rsll4* respond to low temperatures in comparison with control condi-  
150 tions (**Supplementary Figure 2A**). The *rsll2* mutant was highly responsive to low temperatures in a similar  
151 manner to WT while *rsll4* was impaired in the response to cold. The double mutant *rsll2/rsll4* and the triple  
152 mutant *rhdl6/rsll/rsll4* did not develop RHs in either of the two conditions. In addition, constitutive ex-  
153 pression of *RSL4* (*35S:RSL4*) as well as its expression under the control of the RH specific *EXPANSIN7*  
154 promoter (*EXP7p:RSL4*) boosted basal RH growth without further enhancement in response to cold  
155 (**Supplementary Figure 2B**). These results demonstrate that RSL4 is a key factor mediating RHD6 activa-  
156 tion of RH growth at low temperature, and RSL2 might participate to a lower extent.

157 Nutrient unavailability is known to activate RH expansion through a transcriptional reprogram-  
158 ming governed by RHD6 and downstream TFs. The quantification of RH growth of WT plants in response  
159 to increasing concentrations of nutrients (0.5X to 2.0X MS (Murashige and Skoog) medium) indicates that  
160 high concentrations impair RH growth triggered by low temperatures (**Supplementary Figure 3A**). In a  
161 similar way, an increase in agar concentration in the MS medium (from 0.8% to 2.5%), which likely re-  
162 strains nutrient mobility (Singha, S., Townsend, E.C. and Oberly, 1985; Nonami and Boyer, 1989;  
163 Ghashghaie et al., 1991; Buah et al., 1999) blocks cold-induced RH expansion (**Supplementary Figure 3B**).  
164 Altogether, these observations suggest that low temperatures restrict nutrient mobility and availability in  
165 the culture medium, leading to the promotion of polar RH growth.

166  
167 ***APOLO* directly modulates the three-dimensional chromatin conformation of the root hair specific lo-**  
168 **cus *RHD6***

169 Among *APOLO* targets involved in RH development, we found the master regulator of RH initia-  
170 tion *RHD6* (Menand et al., 2007; Pires et al., 2013). The epigenetic profile of the *RHD6* locus corresponds  
171 to typical *APOLO* targets (**Figure 2A**, (Ariel et al., 2020)), including H3K27me3 deposition (track 1), LHP1  
172 recognition (track 2, chromatin immunoprecipitation (ChIP)-Seq, (Veluchamy et al., 2016)), and *APOLO*  
173 binding regions (tracks 3 to 5, chromatin isolation by RNA purification (ChIRP)-Seq, (Ariel et al., 2020)). A  
174 GAAGAA box, shown to be important for *APOLO* target recognition (Ariel et al., 2020) is located in the  
175 *RHD6* locus and coincides with *APOLO* binding site. In addition, a peak of DNA-RNA hybrid immunopre-  
176 cipitation (DRIP)-Seq from root samples indicates the presence of an R-loop coinciding with *APOLO*  
177 recognition sites over *RHD6* (tracks 6 to 8, (Xu et al., 2020)).

178 Remarkably, *APOLO* recognition and R-loop formation are also detectable over *RHD6* neighbor  
179 gene, located 3.2 kb upstream *RHD6* transcription start site (**Figure 2A**). According to *DpnII* Hi-C datasets  
180 from Arabidopsis seedlings (Liu et al., 2016), a chromatin loop encompassing the intergenic region up-  
181 stream *RHD6* was detected (**Figure 2B**), and coincides with *APOLO* binding-sites (**Figure 2A**, ChIRP-Seq).  
182 By performing a ChIRP-qPCR with two independent sets of biotinylated probes to purify *APOLO* (ODD and  
183 EVEN; Ariel et al., 2020) and one additional set used as a negative control (LacZ), we confirmed that  
184 *APOLO* RNA–*RHD6* DNA interaction occurs in WT and is lost in *APOLO* knockdown (RNAi) seedlings ((Ariel  
185 et al., 2014); **Figure 2C**). In addition, the quantification of relative *RHD6* loop formation in RNAi-*APOLO*  
186 and *35S:APOLO* (Ariel et al., 2020) seedlings, revealed impaired loop formation in both lines (**Figure 2D**),  
187 hinting at a stoichiometric requirement of *APOLO* for *RHD6* chromatin loop formation. Chromatin loop  
188 formation (**Figure 2D**) is in agreement with *RHD6* basal levels in *35S:APOLO* and RNAi-*APOLO* lines (**Figure**  
189 **1D**), suggesting that the chromatin loop including *RHD6* promoter region precludes transcription. Alto-  
190 gether, our results indicate that *APOLO* lncRNA directly regulates *RHD6* transcriptional activity by fine-  
191 tuning local chromatin 3D conformation.

192 It was previously reported that PRC2 actively participates in the regulation of RH growth (Ikeuchi  
193 et al., 2015) and that the *RHD6* locus exhibits H3K27me3 deposition and LHP1 recognition (**Figure 2A**;  
194 (Veluchamy et al., 2016)). Considering that the lncRNA *APOLO* interacts with the PRC1 component LHP1  
195 *in vivo* (Ariel et al., 2014; Ariel et al., 2020), we decided to explore the role of PRC1 and PRC2 in *APOLO*-  
196 mediated *RHD6* activation at low temperatures. At 22°C, *RHD6* suffers a reduction of H3K27me3 in the  
197 PRC2 mutant *curly leaf* (*clf*), in contrast to the PRC1 mutant *lhp1* (**Supplementary Figure 4A**; (Veluchamy  
198 et al., 2016)). Interestingly, we observed that H3K27me3 deposition and LHP1 binding diminish in WT  
199 roots treated for 24h at 10°C compared to 22°C (**Supplementary Figure 4B**), consistent with the induction  
200 of *RHD6* in response to cold (**Figure 2E**). Moreover, *lhp1* and *clf* mutants exhibit a basal decrease of RH  
201 length together with a slight decrease of cold-induced RH elongation in *lhp1*, and a strong decrease of  
202 cold-induced RH elongation in *clf* (**Supplementary Figure 4D**). Consistently, although the decrease in  
203 H3K27me3 deposition results in higher basal transcript levels of *RHD6* in the *clf* background, *RHD6* tran-  
204 scriptional activation by cold is abolished in the *clf* and *lhp1* mutants (**Supplementary Figure 4C**), hinting  
205 at an important role of chromatin rearrangement for *RHD6* activation in response to cold.

206

### 207 ***APOLO* interacts with the transcription factor WRKY42 to coordinate the activation of *RHD6***

208 In order to uncover novel actors involved in cold-induced transcriptional regulation of RH  
209 growth, we aimed at identifying *APOLO* protein partners. To this end, we performed an exploratory

210 ChIRP on WT seedlings using two independent set of biotinylated probes to purify *APOLO* (ODD and  
211 EVEN; Ariel et al., 2014; Ariel et al., 2020)), and one additional set used as a negative control (against  
212 LacZ), as recently described (Rigo et al., 2020). Co-purified proteins were precipitated and analyzed by  
213 mass spectrometry. Among the potential *APOLO* partners (i.e. identified with at least two hits in ODD  
214 and EVEN samples, but absent in LacZ-ChIRP), we found the WRKY42 protein, a TF involved in the re-  
215 sponse to Pi starvation (Su et al., 2015), an environmental condition that promotes RH cell expansion  
216 (Bhosale, *et al.*, 2018) in a similar manner to low temperatures. Thus, *APOLO*-WRKY42 interaction was  
217 validated by RNA immuno-precipitation (RIP-qPCR) in tobacco leaves and in *Arabidopsis* plants transitory  
218 or stably transformed with 35S:*WRKY42:GFP*, respectively (**Figure 3A**). Interestingly, according to the  
219 *Arabidopsis* eFP Browser (Waese et al., 2017), *WRKY42* is induced in roots when seedlings are subjected  
220 to 4°C for 24h (**Figure 3B**). At 10°C, we observed that *WRKY42* transcriptional accumulation augments  
221 significantly in roots (**Figure 3C**). Notably, 13 out of the 17 *APOLO* targets contained between 1 and 4  
222 canonical WRKY TF binding sites (W-box) in their promoters, including *RHD6* (**Supplementary Table 1**).  
223 By using a 35S:*WRKY42:GFP* line, we determined that WRKY42 can directly bind to the promoter region  
224 of *RHD6* (**Figure 3D**). Accordingly, the over-expression of *WRKY42* (35S:*WRKY42:GFP* line) led to a basal  
225 increase of *RHD6* levels (**Figure 3E**) and RH elongation (**Figure 3F**) at ambient temperature, mimicking the  
226 effect of cold. On the contrary, cold-mediated induction of *RHD6* is abolished in the *wrky42* mutant ((Su  
227 et al., 2015); **Figure 3E**), which consistently exhibits shorter RHs at 22°C and almost no RH elongation at  
228 low temperatures (**Figure 3F**). Taken together, these results suggest that the *APOLO*-interacting TF  
229 WRKY42 is an important regulator of *RHD6*-mediated RH growth in response to cold.

230 We thus wondered to what extent WRKY42 regulates the epigenetic landscape of the *RHD6* lo-  
231 cus. We first observed that H3K27me3 deposition over *RHD6* is significantly augmented in the *wrky42*  
232 mutant background, in contrast to *AZG2*, an *APOLO* target non-related to WRKY42 (**Figure 4A**), con-  
233 sistent with reduced *RHD6* basal levels reported in *wrky42* (**Figure 3E**). Therefore, we evaluated the mu-  
234 tual contribution of *APOLO* and WRKY42 to their respective recognition of the *RHD6* locus. *APOLO* ChIRP-  
235 qPCR in the WT and *wrky42* mutant (**Figure 4B**) revealed similar binding to *RHD6*, indicating that WRKY42  
236 does not participate in *APOLO*-target recognition. Reciprocally, we assessed the control of *APOLO* over  
237 WRKY42 recognition of the *RHD6* locus. To this end, we transformed transiently *A. thaliana* leaves of WT,  
238 35S:*APOLO* and RNAi-*APOLO* plants with the construct 35S:*WRKY42:GFP*. Observation using confocal  
239 microscopy indicated that WRKY42:GFP is localized in the nucleus in the three genetic backgrounds  
240 (**Supplementary Figure 5**). Remarkably, WRKY42:GFP ChIP-qPCR revealed that WRKY42 binding to *RHD6*  
241 promoter is impaired both in 35S:*APOLO* and RNAi-*APOLO* plants compared to WT (**Figure 4C**), hinting at



242 a stoichiometric role of *APOLO* in the modulation of TF-chromatin interaction. To further confirm our  
243 observations, chromatin was extracted from *35S:WRKY42:GFP* seedlings and increasing amounts of *in*  
244 *vitro* transcribed *APOLO* were added before cross-link and regular WRKY42 ChIP over *RHD6*. Strikingly,  
245 increasing concentrations of *APOLO* gradually decoy WRKY42 away from the *RHD6* locus (**Figure 4D**),  
246 further supporting the hypothesis of a stoichiometric regulation of *APOLO* over the activity of its partner  
247 TF.

248

## 249 **DISCUSSION**

250 Our results indicate that the regulation of *RHD6* expression in response to cold depends on  
251 Polycomb-dependent H3K27me3 dynamic deposition. The WRKY42-*APOLO* complex modulates the  
252 epigenetic environment of *RHD6*, activating its transcription and promoting RH growth at low  
253 temperatures. *RHD6* activation further triggers the expression of *RSL2* and *RSL4* that control the  
254 transcriptional RH program inducing cell expansion in response to cold (**Figure 4E**).

255 Cell fate determination in the epidermis has been extensively studied (Ryu et al., 2005; Song et  
256 al., 2011; Schiefelbein et al., 2014; Balcerowicz et al., 2015). Once trichoblast cells differentiate in the  
257 root epidermis, RHs develop as fast polar growing protuberances in response to endogenous and envi-  
258 ronmental signals (Menand et al., 2007; Yi et al., 2010; Pires et al., 2013; Marzol et al., 2017). RHs are  
259 one of the main entry points in the roots for water-soluble macronutrients, such as Pi and nitrates. Pi is  
260 an essential element for plant growth and development, and the availability of this macronutrient is a  
261 factor limiting plant productivity. In Arabidopsis roots, low Pi in the soil triggers auxin synthesis and  
262 transport, enhancing RH elongation to promote Pi uptake (Bhosale et al., 2018). Thus, auxin mediates  
263 low Pi-induced promotion of RH cell expansion. Under low soil Pi, auxin synthesis is enhanced specifically  
264 in the root cap (Stepanova et al., 2008) and transported (mostly by AUX1, PIN2, and PGP4) from the apex  
265 to the differentiation zone, specifically leading to an increase of auxin levels in trichoblasts (Jones et al.,  
266 2009; Bhosale et al., 2018; Wang et al., 2020). In response to the high-auxin microenvironment, RHs pro-  
267 trude from the root epidermis controlled by RHD6 and RSL1 (Menand et al., 2007; Pires et al., 2013). High  
268 levels of auxin in trichoblasts trigger a signaling cascade mediated by TIR1-ARF19 (and possibly also  
269 ARF7) which directly induces the expression of *RSL4* (and likely of *RSL2*) and promote RH elongation (Yi et  
270 al., 2010; Mangano et al., 2017; Mangano et al., 2018b; Bhosale et al., 2018). ARF7 and ARF19 also acti-  
271 vate other RH genes independently of RSL4 (Schoenaers et al., 2018). Interestingly, our results indicate  
272 that the lncRNA *APOLO* participates in the response to low temperatures. *APOLO* is directly activated by  
273 ARF7 and regulates the transcriptional activity of its neighboring gene *PINOID* (*PID*) by shaping local 3D

274 chromatin conformation (Ariel et al., 2014; Ariel et al., 2020). *PID* encodes a kinase responsible for accu-  
275 rate auxin polar transport by localizing PIN2 in the root cell membrane (Friml et al., 2004). More recently,  
276 it was shown that *APOLO* can recognize a subset of distant genes across the Arabidopsis genome, most  
277 of them being related to auxin synthesis and signalling (Ariel et al., 2020). In this work, we demonstrate  
278 that a group of RH related genes is directly regulated by *APOLO* in response to cold, including the RH  
279 master regulator *RHD6*. Interestingly, *RSL2* and *RSL4* are still activated by cold in RNAi-*APOLO* roots in  
280 contrast to *RHD6* (**Figure 1C** and **Supplementary Figure 2A**), suggesting that additional yet uncovered  
281 factors, which might include ARF TFs, may trigger RH expansion in an *APOLO/RHD6*-independent man-  
282 ner, and hinting at *RSL4* as a key regulator. Furthermore, we found that in addition to *RHD6*, *APOLO* di-  
283 rectly regulates 16 RH-related genes downstream *RHD6* and *RSLs* (**Supplementary Table 1**), hinting at an  
284 intricate regulatory network controlling RH expansion. Collectively, our results uncover a lncRNA-  
285 mediated epigenetic link between environmental signals and auxin homeostasis modulating RH growth.  
286 Moreover, our observations suggest that low temperatures restrict nutrient mobility and availability in  
287 the culture medium, leading to the promotion of polar RH growth. Further research will be needed to  
288 determine what is the limiting nutrient mediating the effect of cold on RH growth.

289         Although substantial progress has been achieved in the identification of the molecular actors  
290 controlling RH development, the impact of chromatin conformation in the transcriptional regulation of  
291 central TFs remains poorly understood. In this study, we have revealed a new mechanism of gene regula-  
292 tion in RHs by which the lncRNA *APOLO* integrates chromatin-associated ribonucleoprotein complexes  
293 together with the TF WYRK42, participating in the transcriptional activation of *RHD6* and the down-  
294 stream RH gene network (**Figure 4E**). *APOLO* directly regulates the chromatin 3D conformation of the  
295 genomic region encompassing the *RHD6* locus and stoichiometrically recruits WYRK42, previously linked  
296 to Pi-starvation (Chen et al., 2009; Su et al., 2015). Low levels of *APOLO* fail to recruit WRKY42 to *RHD6*  
297 promoter region, whereas high levels of *APOLO* likely decoy WRKY42 from target chromatin, as it was  
298 shown for *APOLO* regulation over LHP1 binding activity (Ariel et al., 2020). Notably, low and high levels of  
299 *APOLO* result in higher *RHD6* basal transcriptional accumulation (through LHP1 activity and change in  
300 chromatin status), whereas both extremes impair *RHD6* activation by cold (through WRKY42 binding  
301 modulation; a model is shown in **Supplementary Figure 6**). Our results suggest that an WRKY42-*APOLO*  
302 hub regulates RH cell elongation through the master regulator *RHD6*, although the *APOLO*-WRKY42 hub  
303 potentially targets several additional cell wall related genes (**Supplementary Table 1**) at the end of the  
304 pathway controlled by *RHD6* and the *RHD6*-downstream TFs *RSL2/RSL4* (Mangano et al., 2017; Mangano  
305 et al., 2018a) .

306           Participation of epigenetic factors in root cell identity determination strongly suggests the de-  
307 fault pattern for epidermal cell fate that can be overridden by environmental stimuli (Guimil and  
308 Dunand, 2006). Interestingly, it was reported that the expression of *GLABRA2* (*GL2*), a gene encoding a  
309 TF repressing *RHD6* in atrichoblasts, is tightly regulated at the epigenetic level. By using 3D fluorescence  
310 *in situ* hybridization, it was shown that alternative states of chromatin organization around the *GL2* locus  
311 are required to control position-dependent cell-type specification in the root epidermis (Costa and Shaw,  
312 2006) . Furthermore, *GL2* epigenetic regulation was proposed to be responsive to salt stress (Beyrne et  
313 al., 2019). In addition, a comprehensive characterization of alternative mutant lines uncovered the role  
314 of PRC2 in the regulation of RH development (Ikeuchi et al., 2015). Loss-of-function mutants in different  
315 PRC2 subunits develop unicellular RHs but fail to retain the differentiated state, generating a disor-  
316 ganized cell mass from each single RH. It was shown that the resulting RHs are able to undergo a normal  
317 endoreduplication program, increasing their nuclear ploidy, although they subsequently reinitiate mitotic  
318 division and successive DNA replication. It was proposed that aberrant RH development in PRC2 related  
319 mutants is due to the epigenetic deregulation of key regulatory genes such as *WOUND INDUCED DEDIF-*  
320 *FERENTIATION 3* (*WIND3*) and *LEAFY COTYLEDON 2* (*LEC2*) (Ikeuchi et al., 2015). Here, we showed that  
321 the single mutants *clf* (PRC2) and *lhp1* (PRC1) are affected in RH growth. In addition, we found that  
322 H3K27me3 deposition and LHP1 binding to the *RHD6* locus is modulated by cold. Moreover, we showed  
323 that in the *clf* background, H3K27me3 deposition throughout the *RHD6* locus is partially impaired, and  
324 that the *clf* mutant is affected in RH elongation promoted by cold. Notably, basal transcriptional levels of  
325 *RHD6* are higher in the *clf* mutant (**Supplementary Figure 4C**). A phenotypic characterization revealed  
326 that RH density is not altered in *clf* or *lhp1* mutants, nor in *APOLO* and *WRK42* deregulated lines (**Sup-**  
327 **plementary Figure 7**), suggesting that *RHD6* is not ectopically expressed in epidermic cells. Thus, *RHD6*  
328 over-accumulation may occur in inner cell layers of the root or in RHs, although their elongation in the *clf*  
329 mutant may be blocked by additional perturbations of Polycomb-associated regulation of downstream  
330 genes. Altogether, our results suggest that Polycomb proteins participate in the control of RH-related  
331 genes transcriptional reprogramming at low temperatures.

332           Notably, CLF and LHP1 were shown to interact with a subset of lncRNAs in *Arabidopsis*, modulat-  
333 ing the activity of PRC target genes (Lucero et al., 2020). Interestingly, several lncRNAs have been linked  
334 to the control of transcription in response to cold. *FLOWERING LOCUS C* is regulated by at least three  
335 lncRNAs. First, the alternative splicing of a set of antisense transcripts, collectively named as *COOLAIR*,  
336 depends on the prolonged exposure to cold, epigenetically repressing *FLC* (Marquardt et al., 2014). The  
337 use of the *COOLAIR* proximal poly(A) site results in down-regulation of *FLC* expression in a process involv-

338 ing FLOWERING LOCUS D (FLD), an H3K4me2 demethylase (Marquardt et al., 2014). A second lncRNA  
339 called *COLD ASSISTED INTRONIC NONCODING RNA (COLDAIR)* is fully encoded in the sense strand of the  
340 first intron of *FLC*. Similar to *COOLAIR*, its accumulation oscillates in response to low temperatures. It was  
341 proposed that *COLDAIR* recruits the PRC2 component CLF to target *FLC* for H3K27me3 deposition (Heo  
342 and Sung, 2011). More recently, a third lncRNA modulating *FLC* transcription was identified (Kim and  
343 Sung, 2017). The cold-responsive lncRNA *COLDWRAP* is derived from the *FLC* proximal promoter and it  
344 also interacts with PRC2. It was suggested that *COLDWRAP* functions in cooperation with the lncRNA  
345 *COLDAIR* to retain Polycomb at the *FLC* promoter through the formation of a repressive intragenic chro-  
346 matin loop (Kim and Sung, 2017). Another lncRNA named *SVALKA* was shown to mediate the response to  
347 low temperatures (Kindgren et al., 2018). Interestingly, the activation of *SVALKA* by cold triggers the  
348 transcription of a cryptic downstream lncRNA, which overlaps the antisense locus of the *C-*  
349 *repeat/dehydration-responsive element Binding Factor 1 (CBF1)*, involved in the early response to cold in  
350 Arabidopsis. Antisense transcription causes Pol II head-to-head collision modulating transcriptional ter-  
351 mination of *CBF1* (Kindgren et al., 2018). Here, we show that the auxin-responsive lncRNA *APOLO* is also  
352 transcriptionally modulated by cold. The differential accumulation of 24nt siRNAs across the *APOLO* lo-  
353 cus at low temperatures indicates that this activation is related to a decrease in RdDM. Moreover, we  
354 showed here that the intergenic region between *PID* and *APOLO* acting as a divergent promoter is also  
355 activated at low temperatures in RHs, as revealed by the reporter gene *GFP*. Thus, the lncRNA *APOLO*  
356 integrates external signals into auxin-dependent developmental outputs in Arabidopsis.

357 In the last decade, lncRNAs have emerged as regulators of gene expression at different levels,  
358 ranging from epigenetics to protein modifications and stability (Ariel et al., 2015). Notably, it has been  
359 shown in animals that noncoding transcripts can be recognized by TFs. In humans, it was proposed that  
360 the interaction with the lncRNA *SMALL NUCLEOLAR RNA HOST GENE 15 (SNHG15)* stabilizes the TF Slug  
361 in colon cancer cells. It was shown that *SNHG15* is recognized by the zinc finger domain of Slug prevent-  
362 ing its ubiquitination and degradation in living cells (Jiang et al., 2018). Also, the transcriptional activity of  
363 the human gene *DIHYDROFOLATE REDUCTASE (DHFR)* is regulated by a lncRNA encoded in its proximal  
364 promoter. It was proposed that the nascent noncoding transcript forms a hybrid with its parent DNA and  
365 decoys the regulatory TF IIB away from the *DHFR* promoter, dissociating the transcriptional pre-initiation  
366 complex in quiescent cells (Martianov et al., 2007). The lncRNA *P21 ASSOCIATED ncRNA DNA DAMAGE*  
367 *ACTIVATED (PANDA)* was identified in human cancer and it was activated in response to DNA damage  
368 (Hung et al., 2011). *PANDA* is transcribed from the promoter region of the *CDKN1A* gene and interacts  
369 with the TF NF-YA to limit the expression of pro-apoptotic genes. The activity of *PANDA* has been linked

370 to the progression of different tumors (Kotake et al., 2016; Shi et al., 2019). Interestingly, it was shown  
371 that in addition to NF-YA, *PANDA* interacts with the scaffold-attachment-factor A (SAFA) as well as PRC1  
372 and PRC2 to modulate cell senescence. In proliferating cells, SAFA and *PANDA* recruit Polycomb compo-  
373 nents to repress the transcription of senescence-promoting genes. Conversely, the loss of SAFA–*PANDA*–  
374 PRC interactions allows expression of the senescence program (Puvvula et al., 2014). In this work, we  
375 showed that the PRC1-interacting lncRNA *APOLO* can also be recognized by the TF *WRKY42*, hinting at  
376 general lncRNA-mediated mechanisms linking Polycomb complexes with the transcriptional machinery  
377 across kingdoms. Furthermore, our observations indicate that the deregulation of *WRKY42* affects the  
378 epigenetic environment of *RHD6*. It was previously shown that the addition of *in vitro* transcribed *APOLO*  
379 to RNAi-*APOLO* chromatin extracts was able to partially restore R-loop formation over *APOLO* target  
380 genes, and that high levels of *APOLO* may titer LHP1 away from chromatin (Ariel et al., 2020). Here we  
381 show that the relative accumulation of the lncRNA *APOLO* can modulate the binding activity of its part-  
382 ner TF to common target genes. Collectively, our results strongly support that environmentally con-  
383 trolled cell fate in *Arabidopsis* relies on a transcriptional reprogramming governed by a network of epi-  
384 genetic regulatory complexes, lncRNAs, TFs and effector proteins.

385

## 386 MATERIALS AND METHODS

387

388 **Plant Material and Growth Conditions.** All the *Arabidopsis thaliana* lines used were in the Columbia-0  
389 (Col-0) background. *WRKY42* over expression transgenic plants were generated through *Agrobacterium*  
390 *tumefaciens* (strain EHA105)-mediated transformation (Clough and Bent, 1998). *35S:WRKY42:GFP* trans-  
391 formant lines were selected on MS/2 medium supplemented with kanamycin (40µg/mL) and *WRKY42*  
392 expression levels were measured by RT-qPCR (primers used are listed in **Supplementary Table 3**). The  
393 *wrky42* mutant line belongs to the SALK collection (SALK\_121674C), as the one previously characterized  
394 (Su et al., 2015). The *rhd6-3/rsl1-1/rsl4-1; rsl2; rsl4; rsl2rsl4, 35S:RSL4 and EXP7p:RSL4* transgenic lines  
395 were previously described and characterized (Yi et al., 2010; Hwang et al., 2017) Homozygous plants  
396 were obtained in our laboratory and genotyped using the oligonucleotides indicated in **Supplementary**  
397 **Table 3**. Seeds were surface sterilized and stratified at 4°C for 2d before being grown under long day  
398 conditions (16h light, 140µE.m<sup>-2</sup>.sec<sup>-1</sup>/8h dark), on ½-strength Murashige and Skoog media (1/2 MS)  
399 (Duchefa, Netherlands) with 0.8% plant agar (Duchefa, Netherlands).

400

401 **Cloning procedure.** The coding region of *WRKY42* (AT4G04450) excluding the STOP codon was amplified  
402 by PCR, cloned into the Gateway entry vector pENTR/D-TOPO (Invitrogen) and recombined by Gateway  
403 technology (LR reaction) into the pK7FWG2,0 vector containing a *p35S-GFP* cassette  
404 (<http://www.psb.ugent.be/gateway/index.php>).

405  
406 **Root hair phenotype characterization.** For quantitative analyses of RH phenotypes, 10 fully elongated  
407 RH from the root elongation zone of 15-20 roots, were measured on the same conditions for each par-  
408 ticular case and grown on vertical plates with ½-strength Murashige and Skoog media (1/2 MS) (Duchefa,  
409 Netherlands) and 0.8% plant agar (Duchefa, Netherlands) for 5 days at 22° and 3 days at 10°C. Measure-  
410 ments were made after 8 days. Images were captured with an Olympus SZX7 Zoom Stereo Microscope  
411 (Olympus, Japan) equipped with a Q-Colors digital camera and software Q Capture Pro 7(Olympus, Ja-  
412 pan). RH density was determined as the number of hairs in a representative area of the root elongation  
413 zone using the same setup stated above and ImageJ software. Results were expressed as the mean ±  
414 standard error (SE) and in the case of RH density, values were expressed per mm<sup>2</sup>. All measurements  
415 indicate the average of three independent experiments, each involving 15-20 seedlings.

416  
417 **Confocal microscopy analysis of root hairs.** Confocal laser scanning microscopy was performed using  
418 Zeiss LSM5 Pascal (Zeiss, Germany) and a 40x water-immersion objective, N/A=1.2. Fluorescence was  
419 analyzed by using 488 nm laser for GFP excitation (Laser Intensity: 70%, Detector Gain:550, Amplifier  
420 Offset:0.1, Amplifier Gain:1), and emitted fluorescence was recorded between 490 and 525nm for GFP  
421 tag. Z stacks were done with an optical slice of 1µm, and fluorescence intensity was measured in 15µm  
422 ROI (Region Of Interest) at the RH tip and summed for quantification of fluorescence using ImageJ. Five  
423 replicates for each of ten roots and 15 hairs per root were observed. Col-0 wild type root hairs were used  
424 as a negative control, to check autofluorescence signal occurrence and no signal were detected in the  
425 wavelengths range stated above.

426  
427 **RNA extraction and RT-qPCR.** Total RNA was extracted using TRIZol (Invitrogen) and 2 µg were subjected  
428 to DNase treatment according to the manufacturer's protocol (Thermo Scientific). One µg of DNase-free  
429 RNA was reverse-transcribed using Maxima H Minus Reverse Transcriptase (Thermo Scientific). RT-qPCR  
430 were performed using the LightCycler 480 SYBR Green I Master Kit on a LightCycler480 apparatus  
431 (Roche) using standard protocols (40 cycles, 60°C annealing). *PP2A* (AT1G13320; primers are listed in  
432 **Supplementary Table 3**) was used as reference.

433  
434 **RNA Immunoprecipitation.** RNA immunoprecipitation (RIP) assays were performed on transiently trans-  
435 formed *N. benthamiana* leaves as described in (Sorenson and Bailey-Serres, 2015), or in 10-day-old *A.*  
436 *thaliana* *35S:WRKY42:GFP* seedlings as described in (Bardou et al., 2014), using anti GFP (Abcam ab290)  
437 and anti-IgG (Abcam ab6702). RIP was performed using Invitrogen Protein A Dynabeads. Precipitated  
438 RNAs were prepared using TRI Reagent (Sigma-Aldrich), treated with DNase (Fermentas) and subjected  
439 to RT-qPCR (High Capacity cDNA Reverse Transcription Kit (Thermo); primers used are listed in **Supple-**  
440 **mentary Table 3**). Total RNAs were processed in parallel and considered the input sample.

441  
442 **Chromatin Immunoprecipitation.** Chromatin immunoprecipitation (ChIP) assays were performed on 10-  
443 day-old WT seedlings treated or not during 24h at 10 °C, using anti H3K27me3 (Diagenode pAb-195-050),  
444 anti LHP1 (Covalab pab0923-P) and anti-IgG (Abcam ab6702), as described in (Ariel et al., 2020). Cross-  
445 linked chromatin was sonicated using a water bath Bioruptor Pico (Diagenode; 30sec ON/30sec OFF  
446 pulses; 10 cycles; high intensity). ChIP was performed using Invitrogen Protein A Dynabeads. Precipitated  
447 DNA was recovered using Phenol:Chloroform:Isoamlic Acid (25:24:1; Sigma) and subjected to RT-qPCR  
448 (primers used are listed in **Supplementary Table 3**). Untreated sonicated chromatin was processed in  
449 parallel and considered the input sample. For *in vitro* competition assays, *APOLO* was transcribed using  
450 the T7 transcription kit (Promega; (Ariel et al., 2020)). After regular chromatin isolation from 10-day-old  
451 *35S:WRKY42:GFP* seedlings, the sample was split in 4 independent tubes and diluted to 1ml in Nuclei  
452 Lysis Buffer without SDS. 0 µg, 0.1 µg, 1 µg and 10 µg of *APOLO* were added to each sample respectively,  
453 and incubated in rotation at 4 °C for 3h. Then, cross-linking was performed with 1% formaldehyde for 5  
454 min at 4 °C, followed by 5 min with a final concentration of 50 mM glycine. SDS was added to a final con-  
455 centration of 0.1% prior to sonication and the subsequent steps of a regular ChIP protocol.

456 For ChIP in transiently transformed leaves, 3-week-old *A. thaliana* were transformed as previously de-  
457 scribed (Zhang et al., 2020) In brief, *Agrobacterium tumefaciens* strain GV3101 carrying *35S:WRKY42:GFP*  
458 construct were grown for 2 days in YEB-induced medium plates at 28 °C. *Agrobacterium* cells were  
459 scraped and resuspended in washing solution (10 mM MgCl<sub>2</sub>, 100 µM acetosyringone). Infiltration solu-  
460 tion (¼MS [pH = 6.0], 1% sucrose, 100 µM acetosyringone, 0.005% [v/v, 50 µl/l] Silwet L-77) was pre-  
461 pared with the previous solution, adjusting the OD<sub>600</sub>=0.5. The infiltration was carried out in all leaves >  
462 0.5cm in length of between 10 and 15 plants per genotype (WT, *35S:APOLO* and RNAi-*APOLO* lines). After  
463 infiltration, plants were kept in light for 1h and then in darkness for 24h. Finally they were transferred  
464 back to light. Images and samples were obtained 3 days after infiltration. For image acquisition, infiltrat-

465 ed leaves were imaged with a Leica TCS SP8 confocal laser scanning microscope with excitation at 488  
466 nm (Intensity=8%) and detection at 495-530 nm for GFP and 610-670 (gain 650) nm for chlorophyll fluo-  
467 rescence. Images were captured using 10X and 20X lenses, and processed using Fiji software (Schindelin  
468 et al., 2012).

469  
470 **Chromatin Isolation by RNA Purification followed by qPCR or mass spectrometry.** A method adapted  
471 from the ChIRP protocol (Chu et al., 2012) was developed to allow the identification of plant DNA associ-  
472 ated to specific lncRNAs, as described in (Ariel et al., 2014; Ariel et al., 2020). Briefly, plants were *in vivo*  
473 crosslinked and cell nuclei were purified and extracted through sonication. The resulting supernatant  
474 was hybridized against biotinylated complementary oligonucleotides that tile the lncRNA of interest and  
475 lncRNA-associated chromatin was isolated using magnetic streptavidin beads. One hundred pmol of  
476 probes against *APOLO* (ODD and EVEN set of probes (Ariel et al., 2014; Ariel et al., 2020)) and the corre-  
477 sponding negative set against LacZ were used for independent purification. Co-purified ribonucleopro-  
478 tein complexes were eluted and used to purify RNA or DNA, which were later subjected to downstream  
479 assays for quantification as previously described (Ariel et al., 2020).

480 The exploratory identification of plant nuclear proteins bound to *APOLO* was performed as described in  
481 (Rigo et al., 2020). Plant samples were prepared as for ChIRP-qPCR. For protein extraction, approximately  
482 250 g of 7-day-old Col-0 plants grown on solid half-strength MS medium was irradiated three times with  
483 UV using a CROSSLINKERCL-508 (Uvitec) at 0.400 J/ cm<sup>2</sup>. Protein purification samples for protein extrac-  
484 tion were DNase-treated according to the manufacturer (Thermo Scientific). After addition of 1.8ml of  
485 TCA-acetone (5ml 6.1N TCA + 45ml acetone + 35μl β-mercaptoethanol), samples were incubated over-  
486 night at -80°C. After centrifugation at 20000rpm for 20min at 4°C, the supernatant was discarded and  
487 1.8ml of acetone wash buffer (120ml acetone, 84μl β-mercaptoethanol) was added to the samples.  
488 Then, samples were incubated 1h at -20°C and centrifuged again at 20000 rpm for 20min at 4°C. The  
489 supernatant was discarded, and the dry pellet was used for mass spectrometry analyses.

490  
491 **Chromatin Conformation Capture.** Chromosome conformation capture (3C) was performed basically as  
492 previously described in (Ariel et al., 2020) starting with 2g of seedlings. Digestions were performed over-  
493 night at 37°C with 400U *DpnII* (NEB). DNA was ligated by incubation at 16°C for 5h in 4 ml volume using  
494 100U of T4 DNA ligase (NEB). After reverse crosslinking and Proteinase K treatment (Invitrogen), DNA  
495 was recovered by Phenol:Chloroform:Isoamlic Acid (25:24:1; Sigma) extraction and ethanol precipita-



496 tion. Relative interaction frequency was calculated by qPCR (primers used are listed in **Supplementary**  
497 **Table 3**). A region free of *DpnII* was used to normalize the amount of DNA.

498  
499 **Acknowledgments**  
500 We thank Chang Liu for providing the Hi-C plot of Figure 2B. This work was supported by grants from  
501 ANPCyT (PICT2016-0132 and PICT2017-0066) and Instituto Milenio iBio – Iniciativa Científica Milenio,  
502 MINECON to JME; ANPCyT (PICT2016-0007 and PICT2016-0289) and Fima Leloir Award to FA; UNL (CAI+D  
503 2016) to LL; Laboratoire d'Excellence (LABEX) Saclay Plant Sciences (SPS; ANR-10-LABX-40) to MC; and  
504 CNRS (Laboratoire International Associé NOCOSYM) to MC and FA. LL, FI, JME and FA are researchers of  
505 CONICET; MM, JMP, CFF and JRM are fellows of the same institution. NM is a fellow of ANPCyT.

506  
507 **Author contributions**  
508 MM, JMP, LL, CFF, JRM, NM, AC, MB and FA performed the experiments. JB, MB, FI, MC, JE and FA ana-  
509 lyzed the data. JE and FA conceived the project. FA, JE and CFF wrote the manuscript with the contribu-  
510 tion of all authors.

511  
512 **References**  
513 **Ariel, F., Jegu, T., Latrasse, D., Romero-Barrios, N., Christ, A., Benhamed, M., and Crespi, M.** (2014).  
514 Noncoding transcription by alternative rna polymerases dynamically regulates an auxin-driven  
515 chromatin loop. *Mol. Cell* **55**:383–396.  
516 **Ariel, F., Romero-Barrios, N., Jégu, T., Benhamed, M., and Crespi, M.** (2015). Battles and hijacks:  
517 Noncoding transcription in plants. *Trends Plant Sci.* **20**:362–371.  
518 **Ariel, F., Lucero, L., Christ, A., Mammarella, M. F., Jegu, T., Veluchamy, A., Mariappan, K., Latrasse, D.,**  
519 **Blein, T., Liu, C., et al.** (2020). R-Loop Mediated trans Action of the APOLO Long Noncoding RNA.  
520 *Mol. Cell* **77**:1055-1065.e4.  
521 **Balcerowicz, D., Schoenaers, S., and Vissenberg, K.** (2015). Cell Fate Determination and the Switch from  
522 Diffuse Growth to Planar Polarity in Arabidopsis Root Epidermal Cells. *Front. Plant Sci.* **6**:1–13.  
523 **Bardou, F., Ariel, F., Simpson, C. G., Romero-Barrios, N., Laporte, P., Balzergue, S., Brown, J. W. S., and**  
524 **Crespi, M.** (2014). Long Noncoding RNA Modulates Alternative Splicing Regulators in Arabidopsis.  
525 *Dev. Cell* **30**:166–176.  
526 **Beyrne, C. C., Iusem, N. D., and González, R. M.** (2019). Effect of salt stress on cytosine methylation  
527 within GL2, an Arabidopsis thaliana gene involved in root epidermal cell differentiation. Absence of

528 inheritance in the unstressed progeny. *Int. J. Mol. Sci.* **20**:1–13.

529 **Bhosale, R., Giri, J., Pandey, B. K., Giehl, R. F. H., Hartmann, A., Traini, R., Truskina, J., Leftley, N.,**  
530 **Hanlon, M., Swarup, K., et al.** (2018). A mechanistic framework for auxin dependent Arabidopsis  
531 root hair elongation to low external phosphate. *Nat. Commun.* **9**:1–9.

532 **Bruex, A., Kainkaryam, R. M., Wieckowski, Y., Kang, Y. H., Bernhardt, C., Xia, Y., Zheng, X., Wang, J. Y.,**  
533 **Lee, M. M., Benfey, P., et al.** (2012). A Gene Regulatory Network for Root Epidermis Cell  
534 Differentiation in Arabidopsis. *PLoS Genet.* **8**:1–20.

535 **Buah, J. N., Kawamitsu, Y., Sato, S., and Murayama, S.** (1999). Effects of Different Types and  
536 Concentrations of Gelling Agents on the Physical and Chemical Properties of Media and the Growth  
537 of Banana (*Musa spp.*) in Vitro. *Plant Prod. Sci.* **2**:138–145.

538 **Chen, Y. F., Li, L. Q., Xu, Q., Kong, Y. H., Wang, H., and Wu, W. H.** (2009). The WRKY6 transcription factor  
539 modulates PHOSPHATE1 expression in response to low pi stress in arabidopsis. *Plant Cell* **21**:3554–  
540 3566.

541 **Chu, C., Quinn, J., and Chang, H. Y.** (2012). Chromatin isolation by RNA purification (ChIRP). *J. Vis. Exp.*  
542 Advance Access published March 25, 2012, doi:10.3791/3912.

543 **Clough, S. J., and Bent, A. F.** (1998). Floral dip: a simplified method for *Agrobacterium*-mediated  
544 transformation of *Arabidopsis thaliana*. *Plant J.* **16**:735–43.

545 **Costa, S., and Shaw, P.** (2006). Chromatin organization and cell fate switch respond to positional  
546 information in Arabidopsis. *Nature* **439**:493–496.

547 **Datta, S., Prescott, H., and Dolan, L.** (2015). Intensity of a pulse of RSL4 transcription factor synthesis  
548 determines Arabidopsis root hair cell size. *Nat. Plants* **1**:1–6.

549 **Devaiah, B. N., Karthikeyan, A. S., and Raghothama, K. G.** (2007). WRKY75 transcription factor is a  
550 modulator of phosphate acquisition and root development in Arabidopsis. *Plant Physiol.* **143**:1789–  
551 1801.

552 **Dong, J., Chen, C., and Chen, Z.** (2003). Expression profiles of the Arabidopsis WRKY gene superfamily  
553 during plant defense response. *Plant Mol. Biol.* **51**:21–37.

554 **Franco-Zorrilla, J. M., Valli, A., Todesco, M., Mateos, I., Puga, M. I., Rubio-Somoza, I., Leyva, A., Weigel,**  
555 **D., García, J. A., and Paz-Ares, J.** (2007). Target mimicry provides a new mechanism for regulation  
556 of microRNA activity. *Nat. Genet.* **39**:1033–1037.

557 **Friml, J., Yang, X., Michniewicz, M., Weijers, D., Quint, A., Tietz, O., Benjamins, R., Ouwerkerk, P. B. F.,**  
558 **Ljung, K., Sandberg, G., et al.** (2004). A PINOID-dependent binary switch in apical-basal PIN polar  
559 targeting directs auxin efflux. *Science* **306**:862–5.

- 560 **Ghashghaie, J., Brenckmann, F., and Saugier, B.** (1991). Effects of agar concentration on water status  
561 and growth of rose plants cultured in vitro. *Physiol. Plant.* **82**:73–78.
- 562 **Guimil, S., and Dunand, C.** (2006). Patterning of Arabidopsis epidermal cells: epigenetic factors regulate  
563 the complex epidermal cell fate pathway. *Trends Plant Sci.* **11**:601–609.
- 564 **Gyula, P., Baksa, I., Tóth, T., Mohorianu, I., Dalmay, T., and Szittyá, G.** (2018). Ambient temperature  
565 regulates the expression of a small set of sRNAs influencing plant development through NF-YA2 and  
566 YUC2. *Plant Cell Environ.* **41**:2404–2417.
- 567 **Heo, J. B., and Sung, S.** (2011). Vernalization-mediated epigenetic silencing by a long intronic noncoding  
568 RNA. *Science (80-. )*. **331**:76–9.
- 569 **Hung, T., Wang, Y., Lin, M. F., Koegel, A. K., Kotake, Y., Grant, G. D., Horlings, H. M., Shah, N.,  
570 Umbricht, C., Wang, P., et al.** (2011). Extensive and coordinated transcription of noncoding RNAs  
571 within cell-cycle promoters. In *Nature Genetics*, pp. 621–629. NIH Public Access.
- 572 **Hwang, Y., Choi, H. S., Cho, H. M., and Cho, H. T.** (2017). Tracheophytes contain conserved orthologs of  
573 a basic helix-loop-helix transcription factor that modulate ROOT HAIR SPECIFIC genes. *Plant Cell*  
574 **29**:39–53.
- 575 **Ikeuchi, M., Iwase, A., Rymen, B., Harashima, H., Shibata, M., Ohnuma, M., Breuer, C., Morao, A. K., De  
576 Lucas, M., De Veylder, L., et al.** (2015). PRC2 represses dedifferentiation of mature somatic cells in  
577 Arabidopsis. *Nat. Plants* **1**:1–7.
- 578 **Jabnourne, M., Secco, D., Lecampion, C., Robaglia, C., Shu, Q., and Poirier, Y.** (2013). A Rice cis-Natural  
579 antisense RNA acts as a translational enhancer for its cognate mRNA and contributes to phosphate  
580 homeostasis and plant fitness. *Plant Cell* **25**:4166–4182.
- 581 **Jiang, H., Li, T., Qu, Y., Wang, X., Li, B., Song, J., Sun, X., Tang, Y., Wan, J., Yu, Y., et al.** (2018). Long non-  
582 coding RNA SNHG15 interacts with and stabilizes transcription factor Slug and promotes colon  
583 cancer progression. *Cancer Lett.* **425**:78–87.
- 584 **Jones, A. R., Kramer, E. M., Knox, K., Swarup, R., Bennett, M. J., Lazarus, C. M., Leyser, H. M. O., and  
585 Grierson, C. S.** (2009). Auxin transport through non-hair cells sustains root-hair development. *Nat.*  
586 *Cell Biol.* **11**:78–84.
- 587 **Karas, B., Amyot, L., Johansen, C., Sato, S., Tabata, S., Kawaguchi, M., and Szczyglowski, K.** (2009).  
588 Conservation of Lotus and Arabidopsis basic helix-loop-helix proteins reveals new players in root  
589 hair development. *Plant Physiol.* **151**:1175–1185.
- 590 **Kim, D. H., and Sung, S.** (2017). Vernalization-Triggered Intragenic Chromatin Loop Formation by Long  
591 Noncoding RNAs. *Dev. Cell* **40**:302-312.e4.

- 592 **Kindgren, P., Ard, R., Ivanov, M., and Marquardt, S.** (2018). Transcriptional read-through of the long  
593 non-coding RNA SVALKA governs plant cold acclimation. *Nat. Commun.* **9**:1–11.
- 594 **Kotake, Y., Kitagawa, K., Ohhata, T., Sakai, S., Uchida, C., Niida, H., Naemura, M., and Kitagawa, M.**  
595 (2016). Long Non-coding RNA, PANDA, Contributes to the Stabilization of p53 Tumor Suppressor  
596 Protein. *Anticancer Res.* **36**:1605–11.
- 597 **Lampport, D. T. A., Kieliszewski, M. J., Chen, Y., and Cannon, M. C.** (2011). Role of the Extensin  
598 Superfamily in Primary Cell Wall Architecture. *Plant Physiol.* **156**:11–19.
- 599 **Lin, Q., Ohashi, Y., Kato, M., Tsuge, T., Gu, H., Qu, L. J., and Aoyama, T.** (2015). GLABRA2 directly  
600 suppresses basic helix-loop-helix transcription factor genes with diverse functions in root hair  
601 development. *Plant Cell* **27**:2894–2906.
- 602 **Liu, C., Wang, C., Wang, G., Becker, C., Zaidem, M., and Weigel, D.** (2016). Genome-wide analysis of  
603 chromatin packing in *Arabidopsis thaliana* at single-gene resolution. *Genome Res.* **26**:1057–1068.
- 604 **Lucero, L., Fonouni-Farde, C., Crespi, M., and Ariel, F.** (2020). Long noncoding RNAs shape transcription  
605 in plants. *Transcription Advance Access published May 14, 2020*,  
606 doi:10.1080/21541264.2020.1764312.
- 607 **Mangano, S., Denita-Juarez, S. P., Choi, H. S., Marzol, E., Hwang, Y., Ranocha, P., Velasquez, S. M.,**  
608 **Borassi, C., Barberini, M. L., Aptekmann, A. A., et al.** (2017). Molecular link between auxin and  
609 ROS-mediated polar growth. *Proc. Natl. Acad. Sci. U. S. A.* **114**:5289–5294.
- 610 **Mangano, S., Martínez Pacheco, J., Marino-Buslje, C., and Estevez, J. M.** (2018a). How Does pH Fit in  
611 with Oscillating Polar Growth? *Trends Plant Sci.* **23**:479–489.
- 612 **Mangano, S., Denita-Juarez, S. P., Marzol, E., Borassi, C., and Estevez, J. M.** (2018b). High Auxin and  
613 High Phosphate Impact on RSL2 Expression and ROS-Homeostasis Linked to Root Hair Growth in  
614 *Arabidopsis thaliana*. *Front. Plant Sci.* **9**:1–8.
- 615 **Marquardt, S., Raitskin, O., Wu, Z., Liu, F., Sun, Q., and Dean, C.** (2014). Functional Consequences of  
616 Splicing of the Antisense Transcript COOLAIR on FLC Transcription. *Mol. Cell* **54**:156–165.
- 617 **Martianov, I., Ramadass, A., Serra Barros, A., Chow, N., and Akoulitchev, A.** (2007). Repression of the  
618 human dihydrofolate reductase gene by a non-coding interfering transcript. *Nature* **445**:666–670.
- 619 **Marzol, E., Borassi, C., Denita Juárez, S. P., Mangano, S., and Estevez, J. M.** (2017). RSL4 Takes Control:  
620 Multiple Signals, One Transcription Factor. *Trends Plant Sci.* **22**:553–555.
- 621 **Marzol, E., Borassi, C., Bringas, M., Sede, A., Rodríguez Garcia, D. R., Capece, L., and Estevez, J. M.**  
622 (2018). Filling the Gaps to Solve the Extensin Puzzle. *Mol. Plant* **11**:645–658.
- 623 **Menand, B., Yi, K., Jouannic, S., Hoffmann, L., Ryan, E., Linstead, P., Schaefer, D. G., and Dolan, L.**

- 624 (2007). An ancient mechanism controls the development of cells with a rooting function in land  
625 plants. *Science* (80-. ). **316**:1477–1480.
- 626 **Nonami, H., and Boyer, J. S.** (1989). Turgor and Growth at Low Water Potentials. *Plant Physiol.* **89**:798–  
627 804.
- 628 **Pires, N. D., Yi, K., Breuninger, H., Catarino, B., Menand, B., and Dolan, L.** (2013). Recruitment and  
629 remodeling of an ancient gene regulatory network during land plant evolution. *Proc. Natl. Acad. Sci.*  
630 *U. S. A.* **110**:9571–9576.
- 631 **Puvvula, P. K., Desetty, R. D., Pineau, P., Marchio, A., Moon, A., Dejean, A., and Bischof, O.** (2014). Long  
632 noncoding RNA PANDA and scaffold-attachment-factor SAFA control senescence entry and exit.  
633 *Nat. Commun.* **5**:1–16.
- 634 **Rigo, R., Bazin, J., Romero-Barrios, N., Moison, M., Lucero, L., Christ, A., Benhamed, M., Blein, T.,  
635 Huguet, S., Charon, C., et al.** (2020). An *Arabidopsis* long noncoding RNA modulates the  
636 transcriptome through interactions with a network of splicing factors. Cold Spring Harbor  
637 Laboratory.
- 638 **Ringli, C.** (2010). The hydroxyproline-rich glycoprotein domain of the *Arabidopsis* LRX1 requires Tyr for  
639 function but not for insolubilization in the cell wall. *Plant J.* **63**:662–669.
- 640 **Ryu, K. H., Kang, Y. H., Park, Y. H., Hwang, I., Schiefelbein, J., and Lee, M. M.** (2005). The WEREWOLF  
641 MYB protein directly regulates CAPRICE transcription during cell fate specification in the  
642 *Arabidopsis* root epidermis. *Development* **132**:4765–4775.
- 643 **Schiefelbein, J., Huang, L., and Zheng, X.** (2014). Regulation of epidermal cell fate in *Arabidopsis* roots:  
644 the importance of multiple feedback loops. *Front. Plant Sci.* **5**:1–4.
- 645 **Schindelin, J., Arganda-Carreras, I., Frise, E., Kaynig, V., Longair, M., Pietzsch, T., Preibisch, S., Rueden,  
646 C., Saalfeld, S., Schmid, B., et al.** (2012). Fiji: an open-source platform for biological-image analysis.  
647 *Nat. Methods* **9**:676–682.
- 648 **Schoenaers, S., Balcerowicz, D., Breen, G., Hill, K., Zdanio, M., Mouille, G., Holman, T. J., Oh, J., Wilson,  
649 M. H., Nikonorova, N., et al.** (2018). The Auxin-Regulated CrRLK1L Kinase ERULUS Controls Cell  
650 Wall Composition during Root Hair Tip Growth. *Curr. Biol.* **28**:722-732.e6.
- 651 **Shi, W., Wang, Q., Bian, Y., Fan, Y., Zhou, Y., Feng, T., Li, Z., and Cao, X.** (2019). Long noncoding RNA  
652 PANDA promotes esophageal squamous carcinoma cell progress by dissociating from NF-YA but  
653 interact with SAFA. *Pathol. Res. Pract.* **215**:1–11.
- 654 **Singha, S., Townsend, E.C. and Oberly, G. H.** (1985). Mineral nutrient status of crabapple and pear  
655 shoots cultured in vitro on varying commercial agars. *J. Am. Soc. Hortic. Sci.* **110**:407-411.

- 656 **Song, S. K., Ryu, K. H., Kang, Y. H., Song, J. H., Cho, Y. H., Yoo, S. D., Schiefelbein, J., and Lee, M. M.**  
657 (2011). Cell fate in the Arabidopsis root epidermis is determined by competition between  
658 WEREWOLF and CAPRICE. *Plant Physiol.* **157**:1196–1208.
- 659 **Sorenson, R., and Bailey-Serres, J.** (2015). Rapid immunopurification of ribonucleoprotein complexes of  
660 plants. *Methods Mol. Biol.* **1284**:209–219.
- 661 **Stepanova, A. N., Robertson-Hoyt, J., Yun, J., Benavente, L. M., Xie, D. Y., Doležal, K., Schlereth, A.,**  
662 **Jürgens, G., and Alonso, J. M.** (2008). TAA1-Mediated Auxin Biosynthesis Is Essential for Hormone  
663 Crosstalk and Plant Development. *Cell* **133**:177–191.
- 664 **Su, T., Xu, Q., Zhang, F. C., Chen, Y., Li, L. Q., Wu, W. H., and Chen, Y. F.** (2015). WRKY42 Modulates  
665 phosphate homeostasis through regulating phosphate translocation and acquisition in Arabidopsis.  
666 *Plant Physiol.* **167**:1579–1591.
- 667 **Velasquez, S. M., Ricardi, M. M., Dorosz, J. G., Fernandez, P. V., Nadra, A. D., Pol-Fachin, L., Egelund, J.,**  
668 **Gille, S., Harholt, J., Ciancia, M., et al.** (2011). O-glycosylated cell wall proteins are essential in root  
669 hair growth. *Science (80-. ).* **332**:1401–1403.
- 670 **Velasquez, S. M., Marzol, E., Borassi, C., Pol-Fachin, L., Ricardi, M. M., Mangano, S., Juarez, S. P. D.,**  
671 **Salter, J. D. S., Dorosz, J. G., Marcus, S. E., et al.** (2015). Low Sugar Is Not Always Good: Impact of  
672 Specific O-Glycan Defects on Tip Growth in Arabidopsis. *Plant Physiol.* **168**:808–813.
- 673 **Veluchamy, A., Jégu, T., Ariel, F., Latrasse, D., Mariappan, K. G., Kim, S.-K., Crespi, M., Hirt, H.,**  
674 **Bergounioux, C., Raynaud, C., et al.** (2016). LHP1 Regulates H3K27me3 Spreading and Shapes the  
675 Three-Dimensional Conformation of the Arabidopsis Genome. *PLoS One* **11**:1–25.
- 676 **Vijayakumar, P., Datta, S., and Dolan, L.** (2016). ROOT HAIR DEFECTIVE SIX-LIKE4 (RSL4) promotes root  
677 hair elongation by transcriptionally regulating the expression of genes required for cell growth.  
678 *New Phytol.* **212**:944–953.
- 679 **Waese, J., Fan, J., Pasha, A., Yu, H., Fucile, G., Shi, R., Cumming, M., Kelley, L. A., Sternberg, M. J.,**  
680 **Krishnakumar, V., et al.** (2017). ePlant: Visualizing and exploring multiple levels of data for  
681 hypothesis generation in plant biology. *Plant Cell* **29**:1806–1821.
- 682 **Wang, H., Xu, Q., Kong, Y. H., Chen, Y., Duan, J. Y., Wu, W. H., and Chen, Y. F.** (2014). Arabidopsis  
683 WRKY45 transcription factor activates Phosphate transporter1;1 expression in response to  
684 phosphate starvation. *Plant Physiol.* **164**:2020–2029.
- 685 **Wang, Q., Qin, G., Cao, M., Chen, R., He, Y., Yang, L., Zeng, Z., Yu, Y., Gu, Y., Xing, W., et al.** (2020). A  
686 phosphorylation-based switch controls TAA1-mediated auxin biosynthesis in plants. *Nat. Commun.*  
687 **11**:1–10.

- 688 **Won, S. K., Lee, Y. J., Lee, H. Y., Heo, Y. K., Cho, M., and Cho, H. T.** (2009). cis-element- and  
689 transcriptome-based screening of root hair-specific genes and their functional characterization in  
690 *Arabidopsis*. *Plant Physiol.* **150**:1459–1473.
- 691 **Xu, W., Li, K., Li, S., Hou, Q., Zhang, Y., Liu, K., and Sun, Q.** (2020). The R-Loop Atlas of Arabidopsis  
692 Development and Responses to Environmental Stimuli. *Plant Cell* **32**:888–903.
- 693 **Yi, K., Menand, B., Bell, E., and Dolan, L.** (2010). A basic helix-loop-helix transcription factor controls cell  
694 growth and size in root hairs. *Nat. Genet.* **42**:264–267.
- 695 **Zhang, T. Q., Xu, Z. G., Shang, G. D., and Wang, J. W.** (2019). A Single-Cell RNA Sequencing Profiles the  
696 Developmental Landscape of Arabidopsis Root. *Mol. Plant* **12**:648–660.
- 697 **Zhang, Y., Chen, M., Siemiatkowska, B., Toleco, M. R., Jing, Y., Strotmann, V., Zhang, J., Stahl, Y., and  
698 Fernie, A. R.** (2020). A Highly Efficient Agrobacterium-Mediated Method for Transient Gene  
699 Expression and Functional Studies in Multiple Plant Species. *Plant Commun.* **1**:100028.
- 700

701 **FIGURES AND LEGENDS**

702

703 **Figure 1. *APOLO* regulates root hair elongation in response to low temperatures**

704 **A.** *APOLO* transcript levels measured by RT-qPCR in roots of 10-day-old plants grown at 22 °C treated or  
705 not for 24h at 10 °C.

706 **B.** The *APOLO* promoter region (full intergenic region between *PID* and *APOLO*) is active in root hairs at 22  
707 °C and 10 °C, using the *GFP* reporter gene. Images are representative of the lowest and highest GFP signal  
708 detected in the observation of several roots. The quantification of the fluorescence is shown in the right  
709 panel.

710 **C.** Quantification of RH length of 8-day-old Col-0, RNAi-*APOLO* and 35S:*APOLO* plants, respectively, at 22  
711 °C and 10 °C. Each point is the mean  $\pm$ error of the length of the 10 longest RHs identified in the root  
712 elongation zone in a single root. Representative images of each genotype are shown below the graph.  
713 The scale bar represent 500 $\mu$ m. Asterisks indicate significant differences between Col-0 and the corre-  
714 sponding genotype at the same temperature or significant differences between temperature treatments  
715 on the same genotype at the same temperature (one way ANOVA followed by a Tukey-Kramer test;  
716 “\*”<0.05, “\*\*”<0.01, “\*\*\*”<0.001). NS stands for no statistically significant difference.

717 **D.** *RHD6* transcript levels measured by RT-qPCR in roots of Col-0 plants vs. two independent RNAi-*APOLO*  
718 lines and two independent 35S:*APOLO* lines grown at 22 °C treated or not for 24h at 10 °C.

719 In A and D, the error bars represent the SD of 3 biological replicates. The asterisks indicate that the dif-  
720 ferences are significant (t test  $p$ <0.05). Values are normalized using the constant housekeeping transcript  
721 *PP2A*.

722

723 **Figure 2. *APOLO* directly modulates chromatin three-dimensional conformation of the *RHD6* locus**

724 **A.** Epigenomic landscape of the *RHD6* locus. Lane 1: H3K27me3 deposition by ChIP-Seq (Veluchamy et al.,  
725 2016). Lane 2: LHP1 deposition by ChIP-Seq (Veluchamy et al., 2016). Lane 3 to 5: *APOLO* recognition by  
726 ChIRP-Seq (Lane 3 and 4, using ODD and EVEN sets of probes against *APOLO*, respectively; Lane 5, nega-  
727 tive control using LacZ probes)(Ariel et al., 2020). Lane 6 to 8: R-loop formation by DRIP-Seq (R-loop At-  
728 las, root samples,(Xu et al., 2020), on Watson strand (Lane 6) and Crick strand (Lane 7). DRIP negative  
729 control after RNaseH treatment is shown in Lane 8. Gene annotation is shown at the bottom.

730 **B.** Chromatin loops identified in the *RHD6* region by *DpnII* HiC (Liu et al., 2016). Colors of the loops are  
731 related to the corresponding q-values indicated below. Black boxes in A and B indicate the same genomic  
732 locations, where the bases of the chromatin loop correlate with R-loop formation and *APOLO* recognition



733 (compared to gene annotations). In red the arrows indicate the position of the probes used for 3C-qPCR  
734 shown in **D**.

735 **C.** *APOLO* association to DNA of the *RHD6* locus by ChIRP-qPCR in Col-0 and RNAi-*APOLO* plants. The  
736 background level was determined using a set of probes against LacZ RNA.

737 **D.** Relative chromatin loop formation by 3C-qPCR deduced from **B**, in Col-0 plants vs. *35S:APOLO* and  
738 RNAi lines for the region upstream *RHD6*. The probes used for 3C-qPCR are indicated in red in panel **B**.

739 In C and D, the error bars represent the SD of 3 biological replicates. The asterisks indicate that the dif-  
740 ferences are significant (t test “\*”<0.05, “\*\*\*”<0.001).

741

742 **Figure 3. The transcription factor WRKY42 interacts with APOLO, directly regulates RHD6 and partici-**  
743 **pates in the response to cold**

744 **A.** *APOLO*-*WRKY42* *in vivo* interaction demonstrated by RNA Immunoprecipitation (RIP)-qPCR in transi-  
745 ently transformed tobacco leaves and stably transformed Arabidopsis plants. In tobacco, *WRKY42:GFP*  
746 and *APOLO* were co-transformed under the control of the 35S constitutive promoter. In Arabidopsis,  
747 *35S:WRKY42:GFP* transformed plants were used to detect the interaction with endogenous *APOLO*. Anti-  
748 IgG antibodies were used as a negative control. The RNA *PP2A* was considered as a RIP negative control  
749 in Arabidopsis plants.

750 **B.** Arabidopsis eFP Browser (Waese et al., 2017) plot representing the increase of *WRKY42* transcript  
751 levels in roots of seedlings treated for 24h at 4°C.

752 **C.** *WRKY42* transcript levels measured by RT-qPCR in roots of plants grown at 22°C treated or not for 24h  
753 at 10°C.

754 **D.** Chromatin Immunoprecipitation (ChIP)-qPCR assay revealing regulation by *WRKY42* of *RHD6* by direct  
755 recognition of its promoter region. Probes amplifying *PP2A* were used as a negative control of the exper-  
756 iment. Anti-IgG antibodies were used as a negative control for each pair of probes.

757 **E.** *RHD6* transcript levels measured by RT-qPCR in roots of Col-0 plants vs. *wrky42* mutants and  
758 *35S:WRKY42:GFP* lines grown at 22°C treated or not for 24h at 10°C.

759 **F.** Quantification of RH length of Col-0, *wrky42* and *35S:WRKY42:GFP* plants at 22°C and 10°C. Each point  
760 is the mean of the length of the 10 longest RHs identified in a single root. Representative images of each  
761 genotype are shown on the right. The scale bar represent 500µm. Asterisks indicate significant differ-  
762 ences between Col-0 and the corresponding genotype at the same temperature (one way ANOVA fol-  
763 lowed by a Tukey-Kramer test; “\*”<0.05, “\*\*\*”<0.001).

764 In A, C, D and E, the error bars represent the SD of 3 biological replicates. The asterisks indicate that the  
765 differences are significant (t test  $p < 0.05$ ). NS stands for no statistically significant difference. In C and E,  
766 values are normalized using the constant housekeeping transcript *PP2A*.

767

768 **Figure 4. The WRKY42-*APOLO* hub activates *RHD6* transcription in response to low temperatures, pro-**  
769 **moting root hair expansion**

770 **A.** H3K27me3 deposition in Col-0 vs. *wrky42* mutant 10-day-old seedlings grown at 23°C over *RHD6* and a  
771 WRKY42-independent *APOLO* target (*AZG2*; (Ariel et al., 2020)). An immunoprecipitation (ChIP-qPCR) was  
772 performed using an anti-IgG antibody as a negative control.

773 **B.** *APOLO* association to DNA of the *RHD6* locus by ChIRP-qPCR in Col-0 and *wrky42* mutant plants. The  
774 background level was determined using a set of probes against LacZ RNA.

775 **C.** WRKY42 binding to *RHD6* promoter in transiently transformed leaves of Col-0, RNAi-*APOLO* and  
776 *35S:APOLO* plants. WRKY42:GFP was immunoprecipitated using the anti-GFP antibody (ChIP-qPCR). An  
777 immunoprecipitation was performed using an anti-IgG antibody as a negative control.

778 **D.** WRKY42 immunoprecipitation over *RHD6* with the addition of increasing concentrations of *in vitro*  
779 transcribed *APOLO* prior to cross-linking.

780 **E.** Proposed model for the action of *APOLO* in RH growth under low temperatures. At 22 °C, *RHD6* mod-  
781 erate transcription is regulated by *APOLO*, H3K27me3 and LHP1, maintaining a repressive chromatin loop  
782 encompassing the *RHD6* promoter region. In response to cold, *APOLO* levels increase, still recognizing the  
783 *RHD6* locus by sequence complementarity (R-loops). Then, LHP1 (brown balls) is decoyed away from  
784 chromatin and PRC2-dependent H3K27me3 (green balls) deposition decreases in a process involving  
785 WRKY42 and leading to the opening of the *RHD6* promoter region. Additionally, *APOLO* and WRKY42  
786 jointly activate *RHD6* transcription. *RHD6* activates the transcription of downstream TF genes *RSL2* and *4*  
787 promoting RH cell expansion. Yet unknown factors activate *RSL2* and *4* independently from *APOLO* and  
788 *RHD6* in response to cold. Furthermore, *APOLO* directly regulates a subset of downstream genes, likely  
789 including a subset of them controlled also by WRKY42.

790 In A to D the error bar represents the SD of 3 biological replicates. The asterisk indicates that the differ-  
791 ence is significant (t test “\*” $<0.05$ , “\*\*\*” $<0.01$ ).

792

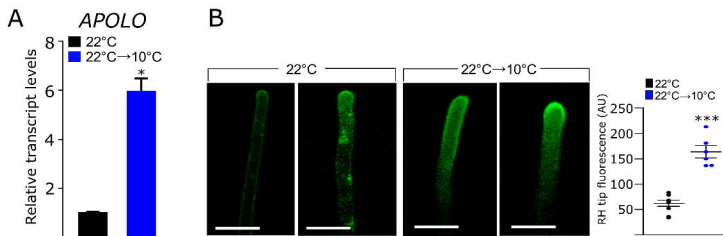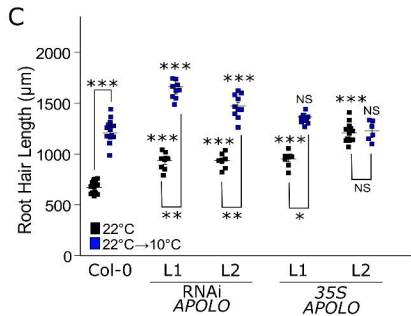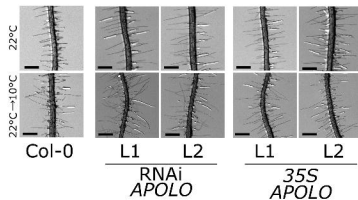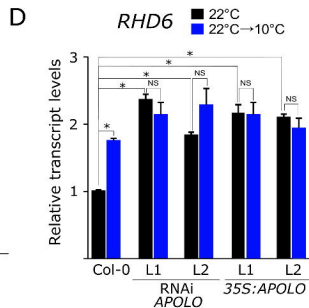

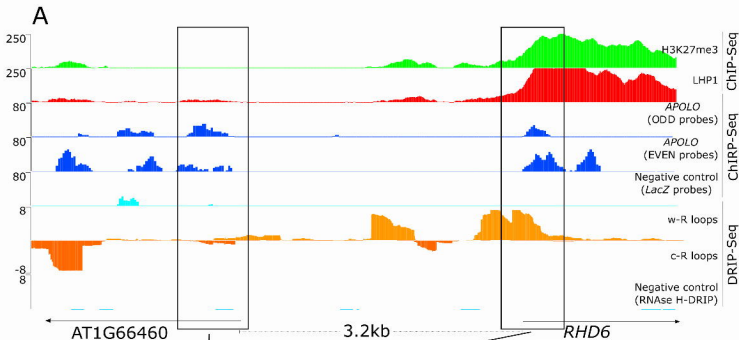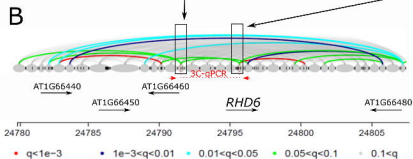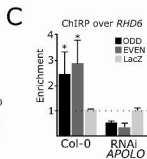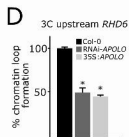

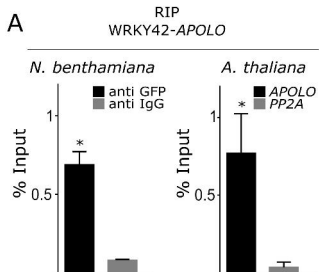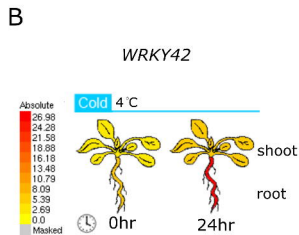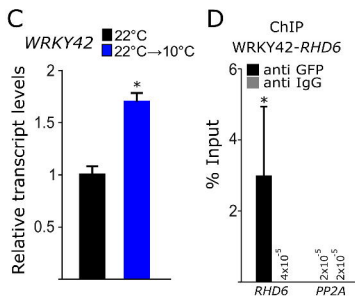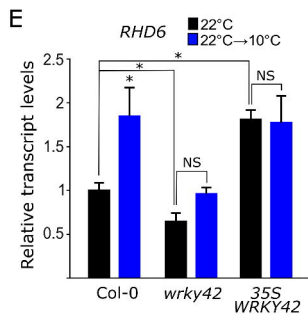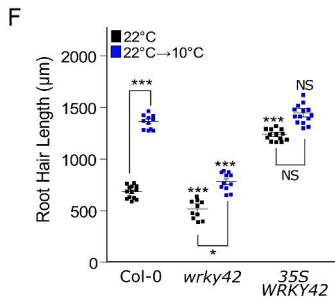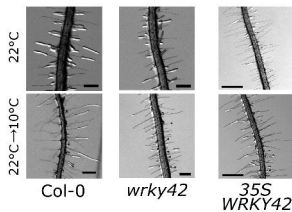

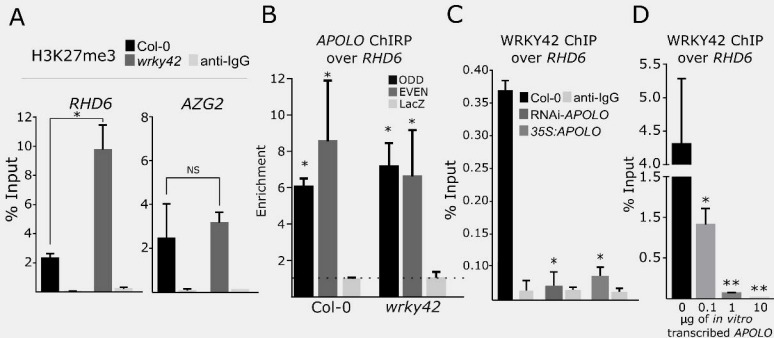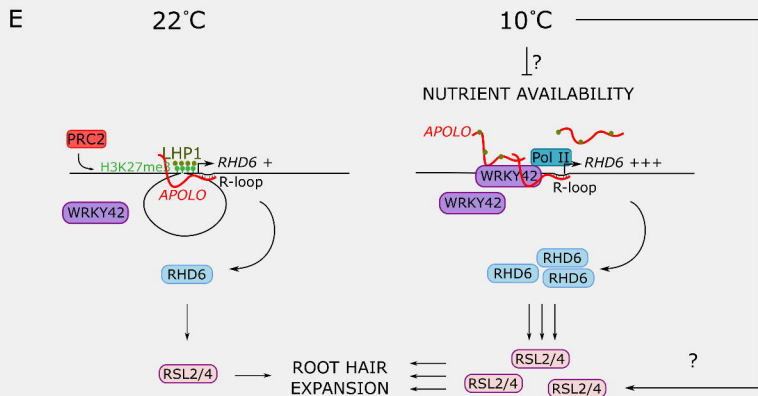

Source: https://www.biorxiv.org/content/10.1101/2020.07.13.188763v4.full.pdf
