1 **The lncRNA *APOLO* interacts with the transcription factor *WRKY42* to trigger root hair cell expansion in**  
2 **response to cold**

3  
4 Michaël Moison<sup>\*1</sup>, Javier Martínez Pacheco<sup>\*2</sup>, Leandro Lucero<sup>\*1</sup>, Camille Fonouni-Farde<sup>1</sup>, Johan  
5 Rodríguez-Melo<sup>3</sup>, Aurélie Christ<sup>4</sup>, Jérémie Bazin<sup>4</sup>; Moussa Benhamed<sup>4</sup>; Fernando Ibañez<sup>3</sup>, Martin Crespi<sup>4</sup>,  
6 José M. Estevez<sup>†,2,5</sup> and Federico Ariel<sup>†1</sup>

7  
8 <sup>1</sup> Instituto de Agrobiotecnología del Litoral, Universidad Nacional del Litoral, CONICET, FBCB, Centro  
9 Científico Tecnológico CONICET Santa Fe, Colectora Ruta Nacional No 168 km. 0, Paraje El Pozo, Santa Fe  
10 3000, Argentina.

11 <sup>2</sup> Fundación Instituto Leloir and IIBBA-CONICET, Av. Patricias Argentinas 435, Buenos Aires CP C1405BWE,  
12 Argentina.

13 <sup>3</sup> Instituto de Investigaciones Agrobiotecnológicas, CONICET, Universidad Nacional de Río Cuarto, Río  
14 Cuarto 5800, Argentina.

15 <sup>4</sup> Institute of Plant Sciences Paris-Saclay (IPS2), CNRS, INRA, University Paris-Saclay and University of Paris  
16 Bâtiment 630, 91192 Gif sur Yvette, France.

17 <sup>5</sup> Centro de Biotecnología Vegetal (CBV), Facultad de Ciencias de la Vida (FCsV), Universidad Andrés Bello,  
18 Santiago, Chile and Millennium Institute for Integrative Biology (iBio), Santiago, Chile.

19  
20 \* These authors contributed equally to this work

21 † Correspondence to: Federico Ariel ([fariel@santafe-conicet.gov.ar](mailto:fariel@santafe-conicet.gov.ar)) and José M. Estevez  
22 ([jestevez@leloir.org.ar](mailto:jestevez@leloir.org.ar))

23

24

25 Text Word count (without Abstract and References): 4,984

26 **ABSTRACT**

27  
28 Plant long noncoding RNAs (lncRNAs) have emerged as important regulators of chromatin dynamics,  
29 impacting on transcriptional programs leading to different developmental outputs. The lncRNA *AUXIN*  
30 *REGULATED PROMOTER LOOP (APOLO)* directly recognizes multiple independent loci across the  
31 *Arabidopsis* genome and modulates their three-dimensional chromatin conformation, leading to  
32 transcriptional shifts. Here, we show that *APOLO* recognizes the locus encoding the root hair (RH) master  
33 regulator ROOT HAIR DEFECTIVE 6 (*RHD6*) and controls *RHD6* transcriptional activity leading to cold-  
34 enhanced RH elongation, in association with the Polycomb Repressive Complexes (PRC) 1 and 2.  
35 Additionally, we demonstrate that *APOLO* interacts with the transcription factor *WRKY42* and modulates  
36 its binding to the *RHD6* promoter. *WRKY42* is required for the activation of *RHD6* by low temperatures  
37 and *WRKY42* deregulation impairs cold-induced RH expansion. Collectively, our results indicate that a  
38 novel ribonucleoprotein complex involving *APOLO* and *WRKY42* forms a regulatory hub which activates  
39 *RHD6* by shaping its epigenetic environment and integrates different signals governing RH growth and  
40 development.

41  
42 **Words:** 160

43  
44 **Key words:** root hairs; cell expansion; long noncoding RNAs; *APOLO*; transcription factors; *RHD6*;  
45 *WRKY42*; cold

## 46 INTRODUCTION

47  
48 Root hairs (RHs) are single cell projections developed from specialized epidermal trichoblast cells  
49 able to increase their size several hundred times in a polar manner to reach and promote the uptake of  
50 water-soluble nutrients, interact with microorganisms and anchor the plant to the soil. The specification  
51 of epidermal cells into RHs involves a cell fate determination process whose underlying mechanisms are  
52 only partially understood. In *Arabidopsis thaliana*, RH cell fate is controlled by a developmental program  
53 involving a complex of transcription factors (TFs) promoting the expression of the homeodomain protein  
54 GLABRA 2 (GL2)(1–4). GL2 blocks RH development by inhibiting the transcription of the master regulator  
55 *ROOT HAIR DEFECTIVE 6 (RHD6)*(5). In the trichoblast cells that differentiate into RHs, a second TF com-  
56 plex suppresses *GL2* expression (3), forcing the cells to enter the RH cell fate program via the concomi-  
57 tant activation of *RHD6* along with downstream TFs (6,7). Briefly, *RHD6* together with its homolog *RHD6*-  
58 *LIKE 1 (RSL1)* induce the expression of other TFs from the bHLH family, including *RSL2* and *RSL4*, ultimate-  
59 ly triggering the differentiation of the RHs and their subsequent polarized tip-growth (8–10). In addition,  
60 it was proposed that *RSL4* controls the expression of a small subset of nearly 125 genes (9, 11–13), in-  
61 cluding several cell wall extensins (*EXTs*) (14, 15) sufficient to promote RH growth (16).

62 RH expansion is regulated both by cell-intrinsic factors (e.g. endogenous phytohormones such as  
63 auxin) and external environmental signals (e.g. phosphate (Pi) availability in the soil) (17, 18). Pi starva-  
64 tion is one of the key environmental factors promoting rapid RH growth (9, 12, 13). In *Arabidopsis*, it  
65 triggers *RSL4* expression via an enhanced auxin production, activating downstream effector genes medi-  
66 ating cell growth (9, 12, 17-19). Accordingly, several auxin-related TFs have been implicated in Pi-  
67 starvation signaling in roots, including *WRKY* proteins that control the expression of the Pi transporter  
68 families Pi-permease *PHO1* and PHOSPHATE TRANSPORTER (*PHT*) (20–23). Under Pi-sufficient conditions,  
69 *WRKY6* and *WRKY42* bind to W-boxes of the *PHO1* promoter and suppress its expression. During Pi star-  
70 vation, *WRKY42* is degraded by the 26S proteasome pathway, resulting in the activation of *PHO1* tran-  
71 scription (21, 23). In addition, *WRKY42* functions as a positive regulator of *PHT1;1*, by binding to its pro-  
72 moter under Pi-sufficient condition (23). Overall, *WRKY42* is part of the components activating root ear-  
73 ly-responses to Pi starvation, although its role in controlling RH growth remains unexplored.

74 In recent years, plant long noncoding RNAs (lncRNAs) have emerged as important regulators of  
75 gene expression, and several among them have been functionally linked to Pi homeostasis. For instance,  
76 the lncRNA *INDUCED BY PHOSPHATE STARVATION 1 (IPS1)* can sequester the Pi starvation-induced mi-  
77 croRNA miR-399, attenuating miR-399-mediated repression of *PHO2*, a gene involved in Pi uptake (24). In

78 addition, the *cis*-natural antisense (*cis*-NAT) transcript *PHO1;2*, induced under Pi deficiency, was shown  
79 to promote the translation of the *PHO1;2* mRNA involved in Pi loading into the xylem. The expression of  
80 this *cis*-NAT is associated with the transport of the sense–antisense RNA pair toward the polysomes (25).  
81 More recently, it was shown that the lncRNA *AUXIN REGULATED PROMOTER LOOP (APOLO)* recognizes  
82 multiple spatially independent genes by sequence complementarity and DNA-RNA duplex formation,  
83 known as R-loops. Upon recognition, *APOLO* shapes the three-dimensional (3D) conformation of its tar-  
84 get regions by decoying the Polycomb Repressive Complex 1 (PRC1) component LIKE HETEROCHROMA-  
85 TIN PROTEIN 1 (LHP1), thereby regulating their transcription (26, 27).

86 Here, we show that the lncRNA *APOLO* directly regulates a subset of genes involved in RH devel-  
87 opment, including the master regulator of RH initiation *RHD6*. *APOLO* activates *RHD6* transcription by  
88 modulating the formation of a local chromatin loop encompassing its promoter region, an epigenetic  
89 regulatory mechanism likely involving PRC1 and PRC2 components. Furthermore, we found that *APOLO*  
90 interacts with the TF WRKY42, forming a new hub that regulates *RHD6* to induce RH growth in response  
91 to low temperatures.

92

## 93 RESULTS

94

### 95 ***APOLO* regulates root hair cell elongation in response to low temperatures**

96 The lncRNA *APOLO* was previously reported to recognize a subset of independent loci enriched in  
97 categories related to cell wall composition and organization (27). A closer look at *APOLO bona fide* targets  
98 allowed us to identify seventeen genes involved in RH growth and expansion (**Supplementary Table 1**), a  
99 process dependent on cell wall remodeling molecules, including EXTs and EXT-related proteins (14, 15,  
100 28–30). Interestingly, according to single-cell RNA-seq datasets (31) *APOLO* transcripts are enriched in RH  
101 cells (**Supplementary Figure 1**). Notably, sixteen *APOLO* direct targets were upregulated and one  
102 downregulated (*EXT18*) upon *APOLO* over-expression (**Supplementary Table 2**). Furthermore, 52 addi-  
103 tional RH-related genes were upregulated in *35S:APOLO* seedlings, albeit not identified as *APOLO* direct  
104 targets (**Supplementary Table 2**) (27). Among them, the RH central TF genes *RHD6* (as a direct target),  
105 *RSL2* and *RSL4* (as indirectly regulated) were induced upon *APOLO* over-expression.

106 It was reported that the *APOLO* locus is targeted by the RNA-polymerase Pol V and silenced by  
107 RNA-directed DNA Methylation (RdDM, (26)). A search in a small RNA-Seq performed in WT roots sub-  
108 jected to different temperature treatments (32) revealed that RdDM-related 24nt siRNA accumulation  
109 over the *APOLO* locus is less abundant at low temperatures (15°C; **Figure 1A**), suggesting that *APOLO*

110 transcription is regulated by cold. Accordingly, we found that *APOLO* transcriptional accumulation in-  
111 creases in roots after 24h at 10°C (**Figure 1B**). An analysis of the promoter activity of the 5.2kb region  
112 upstream *APOLO* (27) directing the expression of a *GFP* reporter gene, additionally revealed a higher  
113 transcriptional activity at low temperatures in the RHs (**Figure 1C**). Strikingly, we observed that two RNAi-  
114 *APOLO* and two *35S:APOLO* independent lines (26, 27) exhibit a basal increase of RH length at 22°C, and  
115 uncovered a strong induction of RH elongation in WT and RNAi-*APOLO* at 10°C, in contrast to *35S:APOLO*  
116 lines (**Figure 1D**). Accordingly, *RHD6* is induced in response to cold in WT roots and RNAi-*APOLO* roots  
117 display higher *RHD6* basal levels than the WT (**Figure 1E**). Collectively, our findings suggest that *APOLO*  
118 participates in the induction of cold-mediated RH elongation and that a deregulation of *APOLO* transcript  
119 levels can impact RH growth.

120 Previous studies pointed out a key role of *RHD6* (together with *RSL1*) in RH development, which  
121 is mediated by *RSL4* and *RSL2* as downstream regulators of RH cell elongation (6, 7). Considering that  
122 *RHD6*, *RSL2* and *RSL4* transcript levels were upregulated in *35S:APOLO* seedlings (**Supplementary Table**  
123 **2**; (27)), we assessed if these TFs were also controlling the promotion of RH growth by low temperatures.  
124 To this end, we tested how *rhd6/rsl1/rsl4* and *rsl2*, *rsl4* and double mutant plants *rsl2/rsl4* respond to  
125 low temperatures in comparison with control conditions. The *rsl2* mutant was highly responsive to low  
126 temperatures in a similar manner to WT while *rsl4* was impaired in the response to cold. The double  
127 mutant *rsl2/rsl4* and the triple mutant *rhd6/rsl1/rsl4* did not develop RHs in either of the two conditions  
128 (**Supplementary Figure 2A**). In addition, constitutive expression of *RSL4* (*35S:RSL4*) as well as its expres-  
129 sion under the control of the RH specific *EXPANSIN7* promoter (*EXP7p:RSL4*) boosted basal RH growth  
130 without further enhancement in response to cold (**Supplementary Figure 2B**). These results demonstrate  
131 that *RSL4* is largely required for *RHD6*-dependent activation of RH growth at low temperatures, and *RSL2*  
132 might participate to a lower extent.

133  
134 ***APOLO* directly modulates the three-dimensional chromatin conformation of the root hair specific lo-**  
135 **cus *RHD6***

136 Among *APOLO* targets involved in RH development, we found the master regulator of RH initia-  
137 tion *RHD6* (6, 7). The epigenetic profile of the *RHD6* locus corresponds to typical *APOLO* targets (**Figure**  
138 **2A**, (27)), including H3K27me3 deposition (track 1), LHP1 recognition (track 2, chromatin  
139 immunoprecipitation (ChIP)-Seq, (33)), and *APOLO* binding regions (tracks 3 to 5, chromatin isolation by  
140 RNA purification (ChIRP)-Seq, (27)). A GAAGAA box, shown to be important for *APOLO* target recognition  
141 (27) is located in the *RHD6* locus and coincides with *APOLO* binding site. In addition, a small peak indi-

142 cates the presence of an R-loop coinciding with *APOLO* recognition sites over *RHD6* (tracks 6 to 9, DNA-  
143 RNA hybrid immunoprecipitation (DRIP)-Seq (34)). The possibility that *RHD6* recognition by *APOLO* occurs  
144 specifically in RHs may explain the dilution of the signal coming from entire seedlings (34).

145 Remarkably, *APOLO* recognition and R-loop formation are also detectable over *RHD6* neighbor  
146 gene, located 3.2 kb upstream *RHD6* transcription start site (**Figure 2A**). According to *DpnII* Hi-C datasets  
147 from Arabidopsis seedlings (35), a chromatin loop encompassing the intergenic region upstream *RHD6*  
148 was detected (**Figure 2B**), exhibiting *APOLO* binding at both sides of the loop base (**Figure 2A**, ChIRP-Seq).  
149 By performing a ChIRP-qPCR with two independent sets of biotinylated probes to purify *APOLO* (ODD and  
150 EVEN; (27)) and one additional set used as a negative control (LacZ), we confirmed that *APOLO* RNA-  
151 *RHD6* DNA interaction occurs in wild-type (WT) and is lost in *APOLO* knockdown (RNAi) seedlings ((26);  
152 **Figure 2C**). In addition, the quantification of relative *RHD6* loop formation in RNAi-*APOLO* and *APOLO*  
153 over-expressing (*35S:APOLO*; (27)) seedlings, revealed impaired loop formation in both lines (**Figure 2D**),  
154 hinting at a stoichiometric requirement of *APOLO* for *RHD6* chromatin loop formation. Accordingly, an  
155 RNA-Seq dataset of *35S:APOLO* seedlings vs. WT (27) indicates that *RHD6* transcript levels are increased  
156 upon *APOLO* over-expression (**Figure 2E, Supplementary Table 1**), suggesting that the chromatin loop  
157 including *RHD6* promoter region precludes transcription. Altogether, our results indicate that *APOLO*  
158 lncRNA directly regulates *RHD6* transcriptional activity by fine-tuning local chromatin 3D conformation.

159 It was previously reported that PRC2 actively participates in the regulation of RH growth (36) and  
160 that the *RHD6* locus exhibits H3K27me3 deposition and LHP1 recognition (**Figure 2A**; (33)). Thus, we de-  
161 cided to explore the role of PRC1 and 2 in *APOLO*-mediated *RHD6* activation at low temperatures. At  
162 22°C, *RHD6* suffers a reduction of H3K27me3 in the PRC2 mutant *curly leaf* (*clf*), in contrast to the PRC1  
163 mutant *lhp1* (**Supplementary Figure 3A**; (33)). Interestingly, we observed that H3K27me3 deposition and  
164 LHP1 binding diminish in WT roots treated for 24h at 10°C compared to 22°C (**Supplementary Figure 3B**),  
165 in agreement with the induction of *RHD6* in response to cold (**Figure 2E**). Moreover, *lhp1* and *clf* mutants  
166 exhibit a basal decrease of RH length together with a slight decrease of cold-induced RH elongation in  
167 *lhp1*, and a strong decrease of cold-induced RH elongation in *clf* (**Supplementary Figure 3D**). Consistently,  
168 *RHD6* transcriptional activation by cold is abolished in the *clf* mutant (**Supplementary Figure 3C**), hinting  
169 at an important role of chromatin rearrangement for *RHD6* activation in response to cold.

170

### 171 ***APOLO* interacts with the transcription factor WRKY42 to coordinate the activation of *RHD6***

172 With the aim of identifying novel actors involved in cold-induced transcriptional regulation of RH  
173 growth, we analyzed the sequence of the promoter regions of RH-related *APOLO* targets. Notably, 13 out

174 of the 17 *APOLO* targets contained between 1 and 4 canonical WRKY TF binding sites (W-box) in their  
175 promoters, including *RHD6* (**Supplementary Table 1**). According to the Arabidopsis eFP Browser (37), the  
176 TF-encoding gene *WRKY42* is induced in roots when seedlings are subjected to 4°C for 24h (**Figure 3A**).  
177 Remarkably, *WRKY42* is involved in the response to Pi starvation (23), an environmental condition that  
178 promotes RH cell expansion (18) in a similar manner to low temperatures. At 10°C, we observed that  
179 *WRKY42* transcriptional accumulation augments significantly in roots (**Figure 3B**). By using a  
180 *35S:WRKY42:GFP* line, we demonstrated that *WRKY42* can directly bind to the promoter region of *RHD6*  
181 (**Figure 3C**). Accordingly, the over-expression of *WRKY42* (*35S:WRKY42:GFP* line) led to a basal increase  
182 of *RHD6* levels (**Figure 3D**) and RH elongation (**Figure 3E**) at ambient temperature, mimicking the effect  
183 of cold. On the contrary, cold-mediated induction of *RHD6* is abolished in the *wrky42* mutant (23; **Figure**  
184 **3D**), which consistently exhibits shorter RHs at 22°C and partially impaired RH elongation at low temper-  
185 atures (**Figure 3E**). Taken together, our results suggest that *WRKY42* is an important regulator of *RHD6*-  
186 mediated RH growth in response to cold.

187 We thus wondered to what extent *WRKY42* regulates the epigenetic landscape of the *RHD6* lo-  
188 cus. We first observed that H3K27me3 deposition over *RHD6* is significantly augmented in the *wrky42*  
189 mutant background, in contrast to *AZG2*, an *APOLO* target non-related to *WRKY42* (**Figure 4A**), con-  
190 sistent with reduced *RHD6* basal levels reported in *wrky42* (**Figure 3D**). Considering that other TFs were  
191 shown to directly interact with lncRNAs in animals (38-40), we wondered if *WRKY42* can recognize  
192 *APOLO* *in planta*. Thus, *APOLO*-*WRKY42* interaction was assessed and validated by RNA immuno-  
193 precipitation (RIP-qPCR) in tobacco leaves and in *Arabidopsis* plants transitory or stably transformed with  
194 *35S:WRKY42:GFP*, respectively (**Figure 4B**). Therefore, we evaluated the mutual contribution of *APOLO*  
195 and *WRKY42* to their respective recognition of the *RHD6* locus. *APOLO* ChIRP-qPCR in the WT and *wrky42*  
196 mutant (**Figure 4C**) revealed similar binding to *RHD6*, indicating that *WRKY42* does not participates in  
197 *APOLO*-target recognition. Reciprocally, we assessed the control of *APOLO* over *WRKY42* recognition of  
198 the *RHD6* locus. To this end, chromatin was extracted from *35S:WRKY42:GFP* seedlings and increasing  
199 amounts of *in vitro* transcribed *APOLO* were added before cross-link and regular *WRKY42* ChIP over  
200 *RHD6*. Strikingly, increasing concentrations of *APOLO* gradually decoy *WRKY42* away from the *RHD6* lo-  
201 cus (**Figure 4D**), hinting at a stoichiometric regulation of *APOLO* over the activity of its partner TF.

202 Collectively, our results indicate that the regulation of *RHD6* expression in response to cold  
203 depends on Polycomb-dependent H3K27me3 dynamic deposition. The *WRKY42*-*APOLO* complex  
204 modulates the epigenetic environment of *RHD6*, activating its transcription and promoting RH growth at

205 low temperatures. *RHD6* activation further triggers the expression of *RSL2* and *RSL4* that control the  
206 transcriptional RH program inducing cell expansion in response to cold (**Figure 4E**).

207

## 208 **DISCUSSION**

209 Cell fate determination in the epidermis has been extensively studied (1–4). Once trichoblast  
210 cells differentiate in the root epidermis, RHs develop as fast polar growing protuberances in response to  
211 endogenous and environmental signals (6, 7, 9, 19). RHs are one of the main entry points in the roots for  
212 water-soluble macronutrients, such as Pi and nitrates. Pi is an essential element for plant growth and  
213 development, and the availability of this macronutrient is a factor limiting plant productivity. Low Pi in  
214 the soil triggers auxin synthesis and transport in *Arabidopsis* roots, enhancing RH elongation to promote  
215 Pi uptake (18). Thus, auxin mediates low Pi-induced promotion of RH cell expansion. Under low soil Pi,  
216 auxin synthesis is enhanced specifically in the root cap (41) and transported (mostly by AUX1, PIN2, and  
217 PGP4) from the apex to the differentiation zone, specifically leading to an increase of auxin levels in  
218 trichoblasts (18, 42, 43). In response to the high-auxin microenvironment, RHs protrude from the root  
219 epidermis controlled by *RHD6* and *RSL1* (6, 7). High levels of auxin in trichoblasts trigger a signaling cas-  
220 cade mediated by TIR1-ARF19 (and possibly also ARF7) that directly induce the expression of *RSL4* (and  
221 likely of *RSL2*) and promote RH elongation (9, 17, 18, 44). ARF7 and ARF19 also activate other RH genes  
222 independently of *RSL4* (45). Interestingly, our results indicate that the lncRNA *APOLO* participates in the  
223 response to low temperatures. *APOLO* is directly activated by ARF7 and regulates the transcriptional  
224 activity of its neighboring gene *PINOID* (*PID*) by shaping local 3D chromatin conformation (26, 27). *PID*  
225 encodes a kinase responsible for accurate auxin polar transport by localizing PIN2 in the root cell mem-  
226 brane (46). More recently, it was shown that *APOLO* can recognize a subset of distant genes across the  
227 *Arabidopsis* genome, most of them being related to auxin synthesis and signaling (27). In this work, we  
228 demonstrate that a group of RH related genes are directly regulated by *APOLO* in response to cold, in-  
229 cluding the RH master regulator *RHD6*. Collectively, our results uncover a lncRNA-mediated epigenetic  
230 link between environmental signals and auxin homeostasis modulating RH growth.

231 As mentioned above, nutrient availability is known to activate RH expansion through a transcrip-  
232 tional reprogramming governed by *RHD6* and downstream TFs. The quantification of RH growth of WT  
233 plants in response to increasing concentrations of nutrients (0.5X to 2.0X MS (Murashige and Skoog) me-  
234 dium) indicates that high concentrations of nutrients completely abolish RH growth triggered by low  
235 temperatures (**Supplementary Figure 4A**). In a similar way, by increasing agar concentration in the MS  
236 medium (from 0.8% to 2.5%) restraining nutrient mobility, cold-induced RH is clearly blocked (**Supple-**



237 **mentary Figure 4B**). Altogether, these observations suggest that low temperatures may restrict nutrient  
238 mobility and availability in the culture medium, leading to the promotion of polar RH growth. Further  
239 research will be needed to determine what is the limiting nutrient mediating the effect of cold on RH  
240 growth.

241 Although substantial progress has been achieved in the identification of the molecular actors  
242 that control RH development, the impact of chromatin conformation in the transcriptional regulation of  
243 central TFs remains poorly understood. In this study, we have revealed a new mechanism of gene regula-  
244 tion in RHs by which the lncRNA *APOLO* integrates chromatin-associated ribonucleoprotein complexes  
245 together with the TF WYRK42, participating in the transcriptional activation of *RHD6* and the down-  
246 stream RH gene network (**Figure 4D**). *APOLO* directly regulates the chromatin 3D conformation of the  
247 genomic region encompassing the *RHD6* locus and stoichiometrically recruits WYRK42, previously linked  
248 to Pi-starvation (21, 23). Our results suggest that an *APOLO*-WYRK42 hub regulates RH cell elongation  
249 through the master regulator RHD6, although the *APOLO*-WYRK42 hub potentially targets several addi-  
250 tional cell wall related genes (**Supplementary Table 1**) at the end of the pathway controlled by RHD6 and  
251 the RHD6-downstream TFs RSL2/RSL4 (17, 47).

252 Participation of epigenetic factors in root cell identity determination strongly suggests that the  
253 default pattern for epidermal cell fate can be overridden by environmental stimuli (48). Interestingly, it  
254 was reported that the expression of *GLABRA2* (*GL2*), a gene encoding a TF repressing *RHD6* in  
255 atrichoblasts, is tightly regulated at the epigenetic level. By using 3D fluorescence *in situ* hybridization, it  
256 was shown that alternative states of chromatin organization around the *GL2* locus are required to con-  
257 trol position-dependent cell-type specification in the root epidermis (49). Furthermore, *GL2* epigenetic  
258 regulation was proposed to be responsive to salt stress (50). In addition, a comprehensive characteriza-  
259 tion of alternative mutant lines uncovered the role of PRC2 in the regulation of RH development (36).  
260 Loss-of-function mutants in different PRC2 subunits develop unicellular RHs but fail to retain the differ-  
261 entiated state, generating a disorganized cell mass from each single RH. It was shown that the resulting  
262 RHs are able to undergo a normal endoreduplication program, increasing their nuclear ploidy, although  
263 they subsequently reinitiate mitotic division and successive DNA replication. It was proposed that aber-  
264 rant RH development in PRC2-related mutants is due to the epigenetic deregulation of key genes such as  
265 *WOUND INDUCED DEDIFFERENTIATION 3* (*WIND3*) and *LEAFY COTYLEDON 2* (*LEC2*) (36). Here, we  
266 showed that the single mutants *clf* (PRC2) and *lhp1* (PRC1) are affected in RH growth. Moreover, we  
267 showed that H3K27me3 deposition throughout the *RHD6* locus is partially impaired in the *clf* back-  
268 ground, which is affected in RH elongation promoted by cold. Altogether, our results suggest that

269 Polycomb proteins participate in the control of RH-related genes transcriptional reprogramming at low  
270 temperatures.

271 Notably, CLF and LHP1 were shown to interact with a subset of lncRNAs in *Arabidopsis*, modulat-  
272 ing the activity of PRC target genes (51). Interestingly, several lncRNAs have been linked to the control of  
273 transcription in response to cold. *FLOWERING LOCUS C* is regulated by at least three lncRNAs. First, the  
274 alternative splicing of a set of antisense transcripts, collectively named as *COOLAIR*, depends on the pro-  
275 longed exposure to cold, epigenetically repressing *FLC* (52). The use of the *COOLAIR* proximal poly(A) site  
276 results in down-regulation of *FLC* expression in a process involving *FLOWERING LOCUS D* (FLD), an  
277 H3K4me2 demethylase (53). A second lncRNA called *COLD ASSISTED INTRONIC NONCODING RNA*  
278 (*COLDAIR*) is fully encoded in the first intron of *FLC*. Similar to *COOLAIR*, its accumulation oscillates in  
279 response to low temperatures. It was proposed that *COLDAIR* recruits the PRC2 component CLF to target  
280 *FLC* for H3K27me3 deposition (54). More recently, a third lncRNA modulating *FLC* transcription was iden-  
281 tified (55). The cold-responsive lncRNA *COLDWRAP* is derived from the *FLC* proximal promoter and it also  
282 interacts with PRC2. It was suggested that *COLDWRAP* functions in cooperation with the lncRNA  
283 *COLDAIR* to retain Polycomb at the *FLC* promoter through the formation of a repressive intragenic chro-  
284 matin loop (55). Another lncRNA named *SVALKA* was shown to mediate the response to low tempera-  
285 tures (56). Interestingly, the activation of *SVALKA* by cold triggers the transcription of a cryptic down-  
286 stream lncRNA, which overlaps the antisense locus of the *C-repeat/dehydration-responsive element Bind-*  
287 *ing Factor 1 (CBF1)*, involved in the early response to cold in *Arabidopsis*. Antisense transcription causes  
288 Pol II head-to-head collision modulating transcriptional termination of *CBF1* (56). Here, we showed that  
289 the auxin-responsive lncRNA *APOLO* is also transcriptionally modulated by cold. The differential accumu-  
290 lation of 24nt siRNAs across the *APOLO* locus at low temperatures indicates that this activation is related  
291 to a decrease in RdDM. Moreover, we showed here that the intergenic region between *PID* and *APOLO*  
292 acting as a divergent promoter is also activated at low temperatures in RHs, as revealed by the reporter  
293 gene *GFP*. Thus, the lncRNA *APOLO* integrates external signals into auxin-dependent developmental out-  
294 puts in *Arabidopsis*.

295 In the last decade, lncRNAs have emerged as regulators of gene expression at different levels,  
296 ranging from epigenetics to protein modifications and stability (57). Notably, it has been shown in ani-  
297 mals that noncoding transcripts can be recognized by TFs. In humans, it was proposed that the interac-  
298 tion with the lncRNA *SMALL NUCLEOLAR RNA HOST GENE 15 (SNHG15)* stabilizes the TF Slug in colon  
299 cancer cells. It was shown that *SNHG15* is recognized by the zinc finger domain of Slug preventing its  
300 ubiquitination and degradation in living cells (38). Also, the transcriptional activity of the human gene

301 *DIHYDROFOLATE REDUCTASE (DHFR)* is regulated by a lncRNA encoded in its proximal promoter. It was  
302 proposed that the nascent noncoding transcript forms a hybrid with its parent DNA and decoys the regu-  
303 latory TF IIB away from the *DHFR* promoter, dissociating the transcriptional pre-initiation complex in  
304 quiescent cells (40). The lncRNA *P21 ASSOCIATED ncRNA DNA DAMAGE ACTIVATED (PANDA)* was identi-  
305 fied in human cancer and it was activated in response to DNA damage (39). *PANDA* is transcribed from  
306 the promoter region of the *CDKN1A* gene and interacts with the TF NF-YA to limit the expression of pro-  
307 apoptotic genes. The activity of *PANDA* has been linked to the progression of different tumors (58, 59).  
308 Interestingly, it was shown that in addition to NF-YA, *PANDA* interacts with the scaffold-attachment-  
309 factor A (SAFA) as well as PRC1 and PRC2 to modulate cell senescence. In proliferating cells, SAFA and  
310 *PANDA* recruit Polycomb components to repress the transcription of senescence-promoting genes. Con-  
311 versely, the loss of SAFA–*PANDA*–PRC interactions allows expression of the senescence program (60). In  
312 this work, we showed that the PRC1-interacting lncRNA *APOLO* can also be recognized by the TF  
313 *WRKY42*, hinting at general lncRNA-mediated mechanisms linking Polycomb complexes with the tran-  
314 scriptional machinery across kingdoms. Furthermore, our observations indicate that the deregulation of  
315 *WRKY42* affects the epigenetic environment of *RHD6*. It was previously shown that the addition of *in*  
316 *vitro* transcribed *APOLO* to RNAi-*APOLO* chromatin extracts was able to partially restore R-loop for-  
317 mation over *APOLO* target genes, and that high levels of *APOLO* may titer LHP1 away from chromatin  
318 (27). Here we showed that the relative accumulation of the lncRNA *APOLO* can modulate the binding  
319 activity of its partner TF to common target genes. Collectively, our results strongly support that environ-  
320 mentally controlled cell fate in *Arabidopsis* relies on a transcriptional reprogramming governed by a  
321 network of epigenetic regulatory complexes, lncRNAs, TFs and effector proteins.

322

## 323 MATERIALS AND METHODS

324

325 **Plant Material and Growth Conditions.** All the *Arabidopsis thaliana* lines used were in the Columbia-0  
326 (Col-0) background. *WRKY42* over expression transgenic plants were generated through *Agrobacterium*  
327 *tumefaciens* (strain EHA105)-mediated transformation (61). *35S:WRKY42:GFP* transformant lines were  
328 selected on MS/2 medium supplemented with kanamycin (40µg/mL) and *WRKY42* expression levels were  
329 measured by RT-qPCR (primers used are listed in **Supplementary Table 3**). The *wrky42* mutant line be-  
330 longs to the SALK collection (SALK\_121674C), as the one previously characterized (23). Homozygous  
331 plants were obtained in our laboratory and genotyped using the oligonucleotides indicated in **Supple-**  
332 **mentary Table 3**. Seeds were surface sterilized and stratified at 4°C for 2d before being grown under

333 long day conditions (16h light, 140 $\mu$ E.m<sup>-2</sup>.sec<sup>-1</sup>/8h dark), on ½-strength Murashige and Skoog media (1/2  
334 MS) (Duchefa, Netherlands) with 0.8% plant agar (Duchefa, Netherlands).

335  
336 **Cloning procedure.** The coding region of *WRKY42* (AT4G04450) excluding the STOP codon was amplified  
337 by PCR, cloned into the Gateway entry vector pENTR/D-TOPO (Invitrogen) and recombined by Gateway  
338 technology (LR reaction) into the pK7FWG2,0 vector containing a *p35S-GFP* cassette  
339 (<http://www.psb.ugent.be/gateway/index.php>).

340  
341 **Root hair phenotype characterization.** For quantitative analyses of RH phenotypes, 100 fully elongated  
342 RHs were measured (using the ImageJ software) from 10-20 roots grown on vertical agar plates for 5  
343 days at 22° and 3 days at 10°C. Measurements were made after 8 days. Images were captured with an  
344 Olympus SZX7 Zoom Stereo microscope (Olympus, Japan) equipped with a Q-Colors digital camera and  
345 software.

346  
347 **Confocal microscopy analysis of root hairs.** Confocal laser scanning microscopy was performed using  
348 Zeiss LSM5 Pascal (Zeiss, Germany) and a 40x water-immersion objective, N/A=1.2. Fluorescence was  
349 analyzed by using 488 nm laser for GFP excitation (Laser Intensity: 70%, Detector Gain:550, Amplifier  
350 Offset:0.1, Amplifier Gain:1), and emitted fluorescence was recorded between 490 and 525nm for GFP  
351 tag. Z stacks were done with an optical slice of 1 $\mu$ m, and fluorescence intensity was measured in 15 $\mu$ m  
352 ROI (Region Of Interest) at the RH tip and summed for quantification of fluorescence using ImageJ. Five  
353 replicates for each of ten roots and 15 hairs per root were observed. Col-0 wild type root hairs were used  
354 as a negative control, to check autofluorescence signal occurrence and no signal were detected in the  
355 wavelengths range stated above.

356  
357 **RNA extraction and RT-qPCR.** Total RNA was extracted using TRIzol (Invitrogen) and 2  $\mu$ g were subjected  
358 to DNase treatment according to the manufacturer's protocol (Thermo Scientific). One  $\mu$ g of DNase-free  
359 RNA was reverse transcribed using Maxima H Minus Reverse Transcriptase (Thermo Scientific). RT-qPCR  
360 were performed using the LightCycler 480 SYBR Green I Master Kit on a LightCycler480 apparatus  
361 (Roche) using standard protocols (40 cycles, 60°C annealing). *PP2A* (AT1G13320; primers are listed in  
362 **Supplementary Table 3**) was used as reference.

363

364 **RNA Immunoprecipitation.** RNA immunoprecipitation (RIP) assays were performed on transiently trans-  
365 formed *N. benthamiana* leaves as described in (62), or in 10-day-old *A. thaliana* *35S:WRKY42:GFP* seed-  
366 lings as described in (63), using anti GFP (Abcam ab290) and anti-IgG (Abcam ab6702). RIP was per-  
367 formed using Invitrogen Protein A Dynabeads. Precipitated RNAs were prepared using TRI Reagent (Sig-  
368 ma-Aldrich), treated with DNase (Fermentas) and subjected to RT-qPCR (High Capacity cDNA Reverse  
369 Transcription Kit (Thermo); primers used are listed in **Supplementary Table 3**). Total RNAs were pro-  
370 cessed in parallel and considered the input sample.

371  
372 **Chromatin Immunoprecipitation.** Chromatin immunoprecipitation (ChIP) assays were performed on 10-  
373 day-old WT seedlings treated or not during 24h at 10 °C, using anti H3K27me3 (Diagenode pAb-195-050),  
374 anti LHP1 (Covalab pab0923-P) and anti-IgG (Abcam ab6702), as described in (27). Crosslinked chromatin  
375 was sonicated using a water bath Bioruptor Pico (Diagenode; 30sec ON/30sec OFF pulses; 10 cycles; high  
376 intensity). ChIP was performed using Invitrogen Protein A Dynabeads. Precipitated DNA was recovered  
377 using Phenol:Chloroform:Isoamlic Acid (25:24:1; Sigma) and subjected to RT-qPCR (primers used are  
378 listed in **Supplementary Table 3**). Untreated sonicated chromatin was processed in parallel and consid-  
379 ered the input sample. For *in vitro* competition assays, *APOLO* was transcribed using the T7 transcription  
380 kit (Promega; (27)). After regular chromatin isolation from 10-day-old *35S:WRKY42:GFP* seedlings, the  
381 sample was split in 4 independent tubes and diluted to 1ml in Nuclei Lysis Buffer without SDS. 0 µg, 0.1  
382 µg, 1 µg and 10 µg of *APOLO* were added to each sample respectively, and incubated in rotation at 4 °C  
383 for 3h. Then, cross-linking was performed with 1% formaldehyde for 5 min at 4 °C, followed by 5 min  
384 with a final concentration of 50 mM glycine. SDS was added to a final concentration of 0.1% prior to son-  
385 ication and the subsequent steps of a regular ChIP protocol.

386  
387 **Chromatin Isolation by RNA Purification followed by qPCR.** A method adapted from the ChIRP protocol  
388 (64) was developed to allow the identification of plant DNA associated to specific lncRNAs, as described  
389 in (26, 27). Briefly, plants were *in vivo* crosslinked and cell nuclei were purified and extracted through  
390 sonication. The resulting supernatant was hybridized against biotinylated complementary oligonucleo-  
391 tides that tile the lncRNA of interest and lncRNA-associated chromatin was isolated using magnetic  
392 streptavidin beads. One hundred pmol of probes against *APOLO* (ODD and EVEN set of probes (26, 27))  
393 and the corresponding negative set against LacZ were used for independent purification. Co-purified  
394 ribonucleoprotein complexes were eluted and used to purify RNA or DNA, which were later subjected to  
395 downstream assays for quantification as previously described (27).

396

397 **Chromatin Conformation Capture.** Chromosome conformation capture (3C) was performed basically as  
398 previously described in (27) starting with 2g of seedlings. Digestions were performed overnight at 37°C  
399 with 400U *DpnII* (NEB). DNA was ligated by incubation at 16°C for 5h in 4 ml volume using 100U of T4  
400 DNA ligase (NEB). After reverse crosslinking and Proteinase K treatment (Invitrogen), DNA was recovered  
401 by Phenol:Chloroform:Isoamlic Acid (25:24:1; Sigma) extraction and ethanol precipitation. Relative in-  
402 teraction frequency was calculated by qPCR (primers used are listed in **Supplementary Table 3**). A region  
403 free of *DpnII* was used to normalize the amount of DNA.

404

#### 405 **Acknowledgments**

406 We thank Chang Liu for providing the Hi-C plot of Figure 2B. This work was supported by grants from  
407 ANPCyT (PICT2016-0132 and PICT2017-0066) and Instituto Milenio iBio – Iniciativa Científica Milenio,  
408 MINECON to JME; ANPCyT (PICT2016-0007 and PICT2016-0289) to FA; UNL (CAI+D 2016) to LL; Labora-  
409 toire d'Excellence (LABEX) Saclay Plant Sciences (SPS; ANR-10-LABX-40) to MC; and CNRS (Laboratoire  
410 International Associé NOCOSYM) to MC and FA. LL, FI, JME and FA are researchers of CONICET; MM,  
411 JMP, CFF and JRM are fellows of the same institution.

412

#### 413 **Author contributions**

414 MM, JMP, LL, CFF, JRM, AC, MB and FA performed the experiments. JB, MB, FI, MC, JE and FA analyzed  
415 the data. JE and FA conceived the project. FA, JE and CFF wrote the manuscript with the contribution of  
416 all authors.

417

#### 418 **References**

- 419 1. K. H. Ryu, *et al.*, The WEREWOLF MYB protein directly regulates CAPRICE transcription during cell  
420 fate specification in the Arabidopsis root epidermis. *Development* **132**, 4765–4775 (2005).
- 421 2. S. K. Song, *et al.*, Cell fate in the Arabidopsis root epidermis is determined by competition be-  
422 tween WEREWOLF and CAPRICE. *Plant Physiol.* **157**, 1196–1208 (2011).
- 423 3. J. Schiefelbein, L. Huang, X. Zheng, Regulation of epidermal cell fate in Arabidopsis roots: The  
424 importance of multiple feedback loops. *Front. Plant Sci.* **5** (2014).
- 425 4. D. Balcerowicz, S. Schoenaers, K. Vissenberg, Cell fate determination and the switch from diffuse  
426 growth to planar polarity in arabidopsis root epidermal cells. *Front. Plant Sci.* **6**, 1163 (2015).
- 427 5. Q. Lin, *et al.*, GLABRA2 directly suppresses basic helix-loop-helix transcription factor genes with

- 428 diverse functions in root hair development. *Plant Cell* **27**, 2894–2906 (2015).
- 429 6. B. Menand, *et al.*, An ancient mechanism controls the development of cells with a rooting func-  
430 tion in land plants. *Science (80-. )*. **316**, 1477–1480 (2007).
- 431 7. N. D. Pires, *et al.*, Recruitment and remodeling of an ancient gene regulatory network during land  
432 plant evolution. *Proc. Natl. Acad. Sci. U. S. A.* **110**, 9571–9576 (2013).
- 433 8. B. Karas, *et al.*, Conservation of Lotus and Arabidopsis basic helix-loop-helix proteins reveals new  
434 players in root hair development. *Plant Physiol.* **151**, 1175–1185 (2009).
- 435 9. K. Yi, B. Menand, E. Bell, L. Dolan, A basic helix-loop-helix transcription factor controls cell growth  
436 and size in root hairs. *Nat. Genet.* **42**, 264–267 (2010).
- 437 10. A. Bruex, *et al.*, A gene regulatory network for root epidermis cell differentiation in Arabidopsis.  
438 *PLoS Genet.* **8** (2012).
- 439 11. S. K. Won, *et al.*, cis-element- and transcriptome-based screening of root hair-specific genes and  
440 their functional characterization in Arabidopsis. *Plant Physiol.* **150**, 1459–1473 (2009).
- 441 12. S. Datta, H. Prescott, L. Dolan, Intensity of a pulse of RSL4 transcription factor synthesis deter-  
442 mines Arabidopsis root hair cell size. *Nat. Plants* **1**, 1–6 (2015).
- 443 13. P. Vijayakumar, S. Datta, L. Dolan, ROOT HAIR DEFECTIVE SIX-LIKE4 (RSL4) promotes root hair  
444 elongation by transcriptionally regulating the expression of genes required for cell growth. *New*  
445 *Phytol.* **212**, 944–953 (2016).
- 446 14. C. Ringli, The hydroxyproline-rich glycoprotein domain of the Arabidopsis LRX1 requires Tyr for  
447 function but not for insolubilization in the cell wall. *Plant J.* **63**, 662–669 (2010).
- 448 15. S. M. Velasquez, *et al.*, O-glycosylated cell wall proteins are essential in root hair growth. *Science*  
449 *(80-. )*. **332**, 1401–1403 (2011).
- 450 16. Y. Hwang, H. S. Choi, H. M. Cho, H. T. Cho, Tracheophytes contain conserved orthologs of a basic  
451 helix-loop-helix transcription factor that modulate ROOT HAIR SPECIFIC genes. *Plant Cell* **29**, 39–  
452 53 (2017).
- 453 17. S. Mangano, *et al.*, Molecular link between auxin and ROS-mediated polar growth. *Proc. Natl.*  
454 *Acad. Sci. U. S. A.* **114**, 5289–5294 (2017).
- 455 18. R. Bhosale, *et al.*, A mechanistic framework for auxin dependent Arabidopsis root hair elongation  
456 to low external phosphate. *Nat. Commun.* **9** (2018).
- 457 19. E. Marzol, C. Borassi, S. P. Denita Juárez, S. Mangano, J. M. Estevez, RSL4 Takes Control: Multiple  
458 Signals, One Transcription Factor. *Trends Plant Sci.* **22**, 553–555 (2017).
- 459 20. B. N. Devaiah, A. S. Karthikeyan, K. G. Raghothama, WRKY75 transcription factor is a modulator of

- 460 phosphate acquisition and root development in Arabidopsis. *Plant Physiol.* **143**, 1789–1801  
461 (2007).
- 462 21. Y. F. Chen, *et al.*, The WRKY6 transcription factor modulates PHOSPHATE1 expression in response  
463 to low pi stress in arabidopsis. *Plant Cell* **21**, 3554–3566 (2009).
- 464 22. H. Wang, *et al.*, Arabidopsis WRKY45 transcription factor activates Phosphate transporter1;1 ex-  
465 pression in response to phosphate starvation. *Plant Physiol.* **164**, 2020–2029 (2014).
- 466 23. T. Su, *et al.*, WRKY42 Modulates phosphate homeostasis through regulating phosphate transloca-  
467 tion and acquisition in Arabidopsis. *Plant Physiol.* **167**, 1579–1591 (2015).
- 468 24. J. M. Franco-Zorrilla, *et al.*, Target mimicry provides a new mechanism for regulation of microRNA  
469 activity. *Nat. Genet.* **39**, 1033–1037 (2007).
- 470 25. M. Jabnourne, *et al.*, A Rice cis-Natural antisense RNA acts as a translational enhancer for its cog-  
471 nate mRNA and contributes to phosphate homeostasis and plant fitness. *Plant Cell* **25**, 4166–4182  
472 (2013).
- 473 26. F. Ariel, *et al.*, Noncoding transcription by alternative rna polymerases dynamically regulates an  
474 auxin-driven chromatin loop. *Mol. Cell* **55**, 383–396 (2014).
- 475 27. F. Ariel, *et al.*, R-Loop Mediated trans Action of the APOLO Long Noncoding RNA. *Mol. Cell* **77**,  
476 1055-1065.e4 (2020).
- 477 28. D. T. A. Lamport, M. J. Kieliszewski, Y. Chen, M. C. Cannon, Role of the Extensin Superfamily in  
478 Primary Cell Wall Architecture. *Plant Physiol.* **156**, 11–19 (2011).
- 479 29. S. M. Velasquez, *et al.*, Low sugar is not always good: Impact of specific o-glycan defects on tip  
480 growth in arabidopsis. *Plant Physiol.* **168**, 808–813 (2015).
- 481 30. E. Marzol, *et al.*, Filling the Gaps to Solve the Extensin Puzzle. *Mol. Plant* **11**, 645–658 (2018).
- 482 31. T.Q. Zhang, Z.G. Xu, G.D. Shang, J.W. Wang, A Single-Cell RNA Sequencing Profiles the Develop-  
483 mental Landscape of Arabidopsis Root. *Mol Plant.* **12**, 648-660 (2019).
- 484 32. P. Gyula, *et al.*, Ambient temperature regulates the expression of a small set of sRNAs influencing  
485 plant development through NF-YA2 and YUC2. *Plant Cell Environ.* **41**, 2404–2417 (2018).
- 486 33. A. Veluchamy, *et al.*, LHP1 Regulates H3K27me3 Spreading and Shapes the Three-Dimensional  
487 Conformation of the Arabidopsis Genome. *PLoS One* **11**, e0158936 (2016).
- 488 34. W. Xu, *et al.*, The R-loop is a common chromatin feature of the Arabidopsis genome. *Nat. Plants*  
489 **3**, 704–714 (2017).
- 490 35. C. Liu, *et al.*, Genome-wide analysis of chromatin packing in Arabidopsis thaliana at single-gene  
491 resolution. *Genome Res.* **26**, 1057–1068 (2016).



- 492 36. M. Ikeuchi, *et al.*, PRC2 represses dedifferentiation of mature somatic cells in Arabidopsis. *Nat.*  
493 *Plants* **1**, 1–7 (2015).
- 494 37. J. Waese, *et al.*, ePlant: Visualizing and Exploring Multiple Levels of Data for Hypothesis Genera-  
495 tion in Plant Biology. *Plant Cell* **29**, 1806–1821 (2017).
- 496 38. H. Jiang, *et al.*, Long non-coding RNA SNHG15 interacts with and stabilizes transcription factor  
497 Slug and promotes colon cancer progression. *Cancer Lett.* **425**, 78–87 (2018).
- 498 39. T. Hung, *et al.*, Extensive and coordinated transcription of noncoding RNAs within cell-cycle pro-  
499 moters in *Nature Genetics*, (NIH Public Access, 2011), pp. 621–629.
- 500 40. I. Martianov, *et al.*, Repression of the human dihydrofolate reductase gene by a non-coding inter-  
501 fering transcript. *Nature* **445**, 666–670 (2007).
- 502
- 503
- 504 41. A. N. Stepanova, *et al.*, TAA1-Mediated Auxin Biosynthesis Is Essential for Hormone Crosstalk and  
505 Plant Development. *Cell* **133**, 177–191 (2008).
- 506 42. A. R. Jones, *et al.*, Auxin transport through non-hair cells sustains root-hair development. *Nat. Cell*  
507 *Biol.* **11**, 78–84 (2009).
- 508 43. Q. Wang, *et al.*, A phosphorylation-based switch controls TAA1-mediated auxin biosynthesis in  
509 plants. *Nat. Commun.* **11**, 679 (2020).
- 510 44. S. Mangano, S. P. Denita-Juarez, E. Marzol, C. Borassi, J. M. Estevez, High auxin and high phos-  
511 phate impact on *rsl2* expression and *ros*-homeostasis linked to root hair growth in Arabidopsis  
512 *thaliana*. *Front. Plant Sci.* **9** (2018).
- 513 45. S. Schoenaers, *et al.*, The Auxin-Regulated CrRLK1L Kinase ERULUS Controls Cell Wall Composition  
514 during Root Hair Tip Growth. *Curr. Biol.* **28**, 722–732.e6 (2018).
- 515 46. J. Friml, *et al.*, A PINOID-dependent binary switch in apical-basal PIN polar targeting directs auxin  
516 efflux. *Science (80-. )*. **306**, 862–865 (2004).
- 517 47. S. Mangano, J. Martínez Pacheco, C. Marino-Buslje, J. M. Estevez, How Does pH Fit in with Oscil-  
518 lating Polar Growth? *Trends Plant Sci.* **23**, 479–489 (2018).
- 519 48. S. Guimil, C. Dunand, Patterning of Arabidopsis epidermal cells: epigenetic factors regulate the  
520 complex epidermal cell fate pathway. *Trends Plant Sci.* **11**, 601–609 (2006).
- 521 49. S. Costa, P. Shaw, Chromatin organization and cell fate switch respond to positional information  
522 in Arabidopsis. *Nature* **439**, 493–496 (2006).
- 523 50. C. C. Beyrne, N. D. Iusem, R. M. González, Effect of salt stress on cytosine methylation within GL2,

- 524 an Arabidopsis thaliana gene involved in root epidermal cell differentiation. Absence of inher-  
525 itance in the unstressed progeny. *Int. J. Mol. Sci.* **20** (2019).
- 526 51 L. Lucero, *et al.*, Long noncoding RNAs shape transcription in plants. *Transcription* (2020).
- 527 52. S. Marquardt, *et al.*, Functional Consequences of Splicing of the Antisense Transcript COOLAIR on  
528 FLC Transcription. *Mol. Cell* **54**, 156–165 (2014).
- 529 53. F. Liu, S. Marquardt, C. Lister, S. Swiezewski, C. Dean, Targeted 3' processing of antisense tran-  
530 scripts triggers arabidopsis FLC chromatin silencing. *Science (80-.)*. **327**, 94–97 (2010).
- 531 54. J. B. Heo, S. Sung, Vernalization-mediated epigenetic silencing by a long intronic noncoding RNA.  
532 *Science (80-. )*. **331**, 76–79 (2011).
- 533 55. D. H. Kim, S. Sung, Vernalization-Triggered Intragenic Chromatin Loop Formation by Long Noncod-  
534 ing RNAs. *Dev. Cell* **40**, 302-312.e4 (2017).
- 535 56. P. Kindgren, R. Ard, M. Ivanov, S. Marquardt, Transcriptional read-through of the long non-coding  
536 RNA SVALKKA governs plant cold acclimation. *Nat. Commun.* **9**, 1–11 (2018).
- 537 57. F. Ariel, *et al.*, Battles and hijacks: noncoding transcription in plants. *TIPS* **20**, 362–371 (2015).
- 538 58. Y. Kotake, *et al.*, Long Non-coding RNA, PANDA, Contributes to the Stabilization of p53 Tumor  
539 Suppressor Protein. *Anticancer Res.* **36**, 1605–11 (2016).
- 540 59. W. Shi, *et al.*, Long noncoding RNA PANDA promotes esophageal squamous carcinoma cell pro-  
541 gress by dissociating from NF-YA but interact with SAFA. *Pathol. Research and Practice* **215**,  
542 152604 (2019).
- 543 60. P. K. Puvvula, *et al.*, Long noncoding RNA PANDA and scaffold-attachment-factor SAFA control  
544 senescence entry and exit. *Nat. Commun.* **5** (2014).
- 545 61. S.J. Clough, A.F. Bent, Floral dip: a simplified method for Agrobacterium -mediated transformation  
546 of Arabidopsis thaliana. *The Plant Journal* **16**, 735-743 (1998).
- 547 62. R. Sorenson, J. Bailey-Serres, Rapid immunopurification of ribonucleoprotein complexes of plants.  
548 *Methods Mol. Biol.* **1284**, 209–219 (2015).
- 549 63. F. Bardou, *et al.*, Long Noncoding RNA Modulates Alternative Splicing Regulators in Arabidopsis.  
550 *Dev. Cell* **30**, 166–176 (2014).
- 551 64. C. Chu, J. Quinn, H. Y. Chang, Chromatin isolation by RNA purification (ChIRP). *J. Vis. Exp.* (2012)  
552 <https://doi.org/10.3791/3912>.
- 553 65. J. Dong, C. Chen, Z. Chen, Expression profiles of the Arabidopsis WRKY gene superfamily during  
554 plant defense response. *Plant Mol. Biol.* **51**, 21–37 (2003).

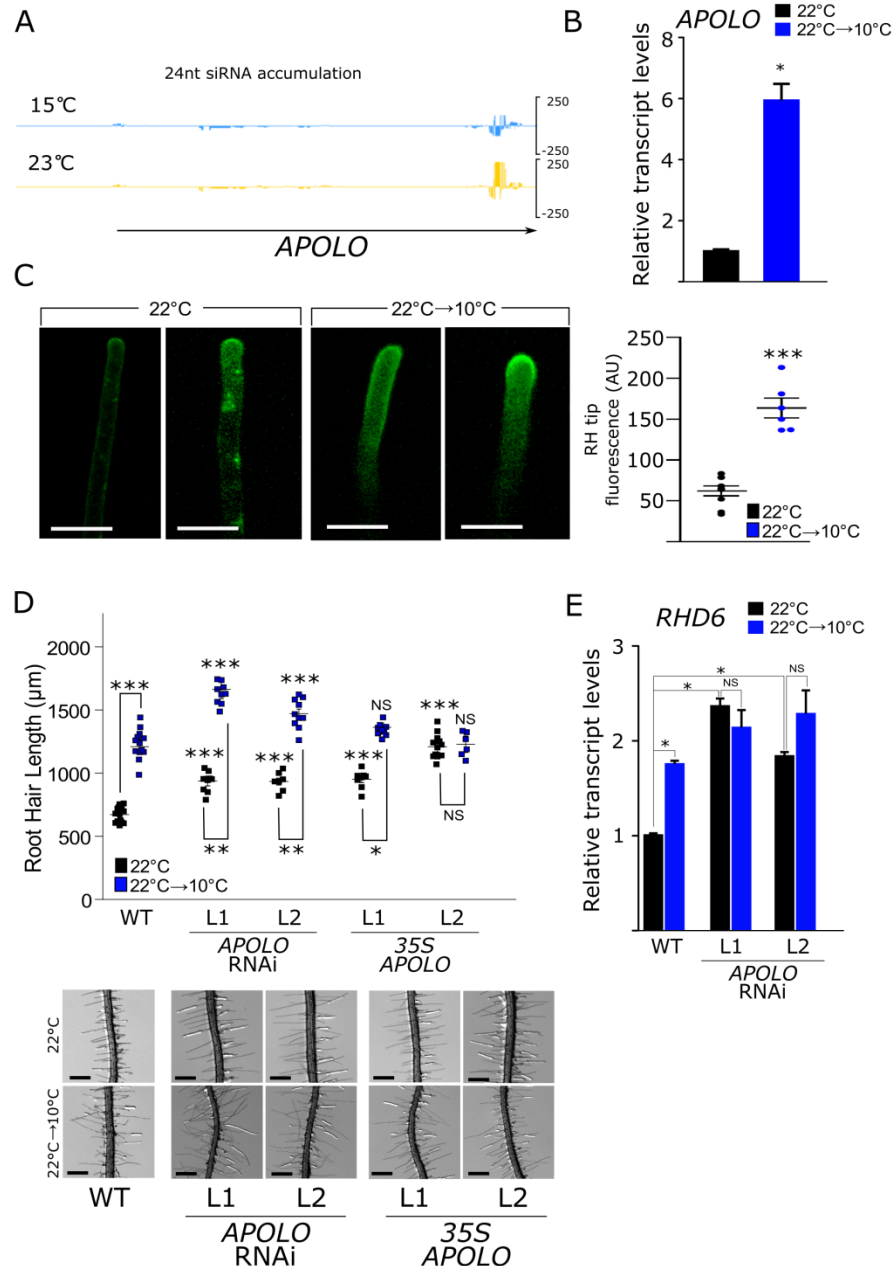

555

556 **Figure 1. *APOLO* regulates root hair elongation in response to low temperatures**

557 **A.** 24nt siRNA accumulation over the *APOLO* locus revealed by small RNA-Seq of roots from WT seedlings  
558 grown at 15 °C or 23 °C (32).

559 **B.** *APOLO* transcript levels measured by RT-qPCR in roots of 10-day-old plants grown at 22 °C treated or  
560 not for 24h at 10 °C.

561 **C.** The *APOLO* promoter region (full intergenic region between *PID* and *APOLO*) is active in root hairs at 22  
562 °C and 10 °C, using the *GFP* reporter gene. Images are representative of the lowest and highest GFP signal  
563 detected in the observation of several roots. The quantification of the fluorescence is shown in the right  
564 panel.

565 **D.** Quantification of RH length of 8-day-old WT, RNAi-*APOLO* and *35S:APOLO* plants, respectively, at 22 °C  
566 and 10 °C. Each point is the mean of the length of the 10 longest RHs identified in a single root. Re-

567    sentative images of each genotype are shown below the graph. Asterisks indicate significant differences  
568    between WT and the corresponding genotype at the same temperature (one way ANOVA followed by a  
569    Tukey-Kramer test; “\*”<0.05, “\*\*”<0.01, “\*\*\*”<0.001, NS: no statistically significant).  
570    **E.** *RHD6* transcript levels measured by RT-qPCR in roots of WT plants vs. two independent RNAi-*APOLO*  
571    lines grown at 22 °C treated or not for 24h at 10 °C.  
572    In B and E, the error bar represents the SD of 3 biological replicates. The asterisk indicates that the dif-  
573    ference is significant (t test p<0.05).

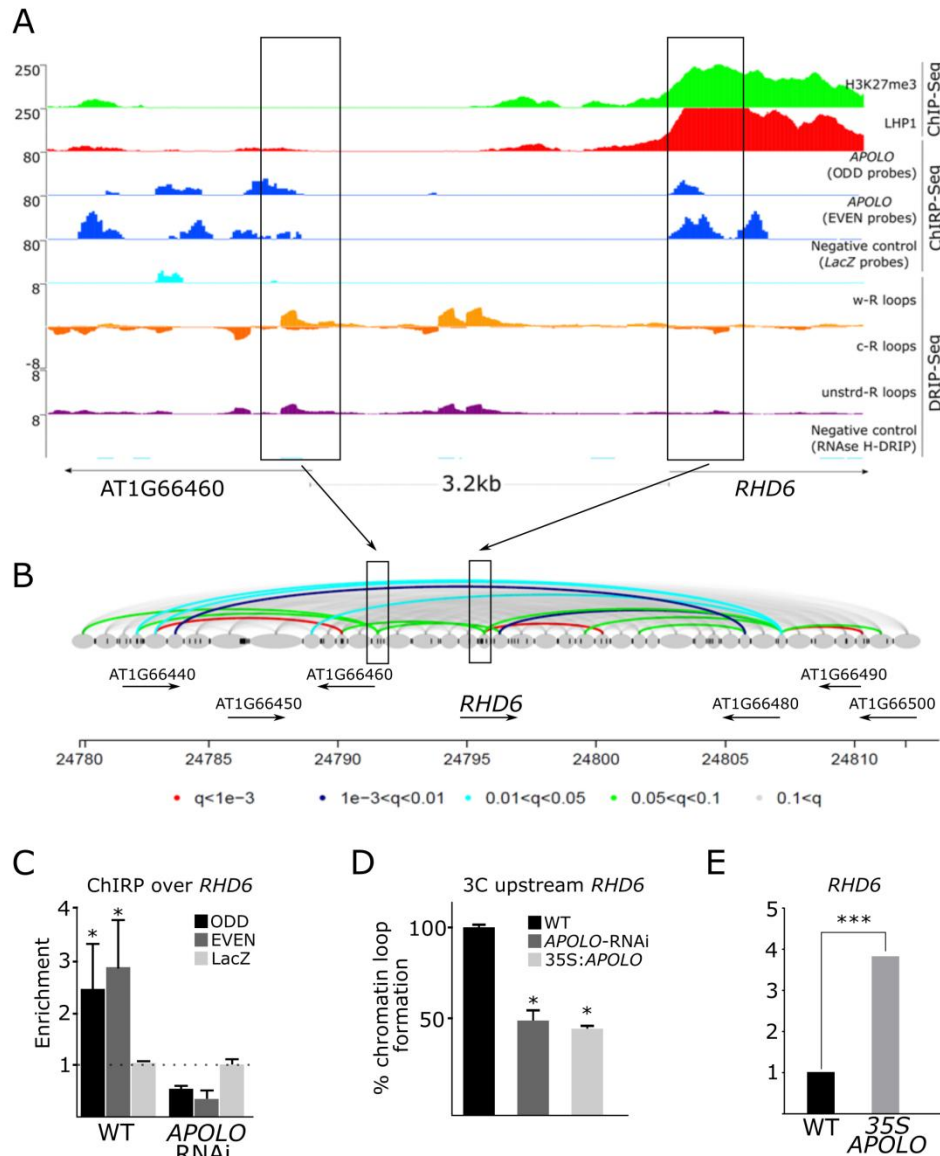

574

575 **Figure 2. APOLO directly modulates chromatin three-dimensional conformation of the RHD6 locus**

576 **A.** Epigenomic landscape of the RHD6 locus. Lane 1: H3K27me3 deposition by ChIP-Seq (33). Lane 2: LHP1  
577 deposition by ChIP-Seq (33). Lane 3 to 5: APOLO recognition by ChIRP-Seq (Lane 3 and 4, using ODD and  
578 EVEN sets of probes against APOLO, respectively; Lane 5, negative control using LacZ probes)(27). Lane 6  
579 to 9: R-loop formation by DRIP-Seq (34), on Watson strand (Lane 6), Crick strand (Lane 7) or unstranded  
580 sequencing (Lane 8). DRIP negative control after RNaseH treatment is shown in Lane 9. Gene annotation  
581 is shown at the bottom.

582 **B.** Chromatin loops identified in the RHD6 region by DpnII HiC (35). Colors of the loops are related to the  
583 corresponding q-values indicated below. Black boxes in A and B indicate the same genomic locations,  
584 where the bases of the chromatin loop correlate with R-loop formation and APOLO recognition (com-  
585 pared to gene annotations).

586 **C.** APOLO association to DNA of the RHD6 locus by ChIRP-qPCR in WT and RNAi-APOLO plants. The back-  
587 ground level was determined using a set of probes against LacZ RNA.

588 **D.** Relative chromatin loop formation by 3C-qPCR deduced from **B**, in WT plants vs. *35S:APOLO* and RNAi  
589 lines for the region upstream *RHD6*.  
590 **E.** *RHD6* transcript levels revealed by RNA-Seq of WT vs. *35S:APOLO* plants(27).  
591 In C and D, the error bar represents the SD of 3 biological replicates. The asterisk indicates that the dif-  
592 ference is significant (t test “\*”<0.05). In E, p-value from RNA-Seq (27) “\*\*\*”<0.001.  
593

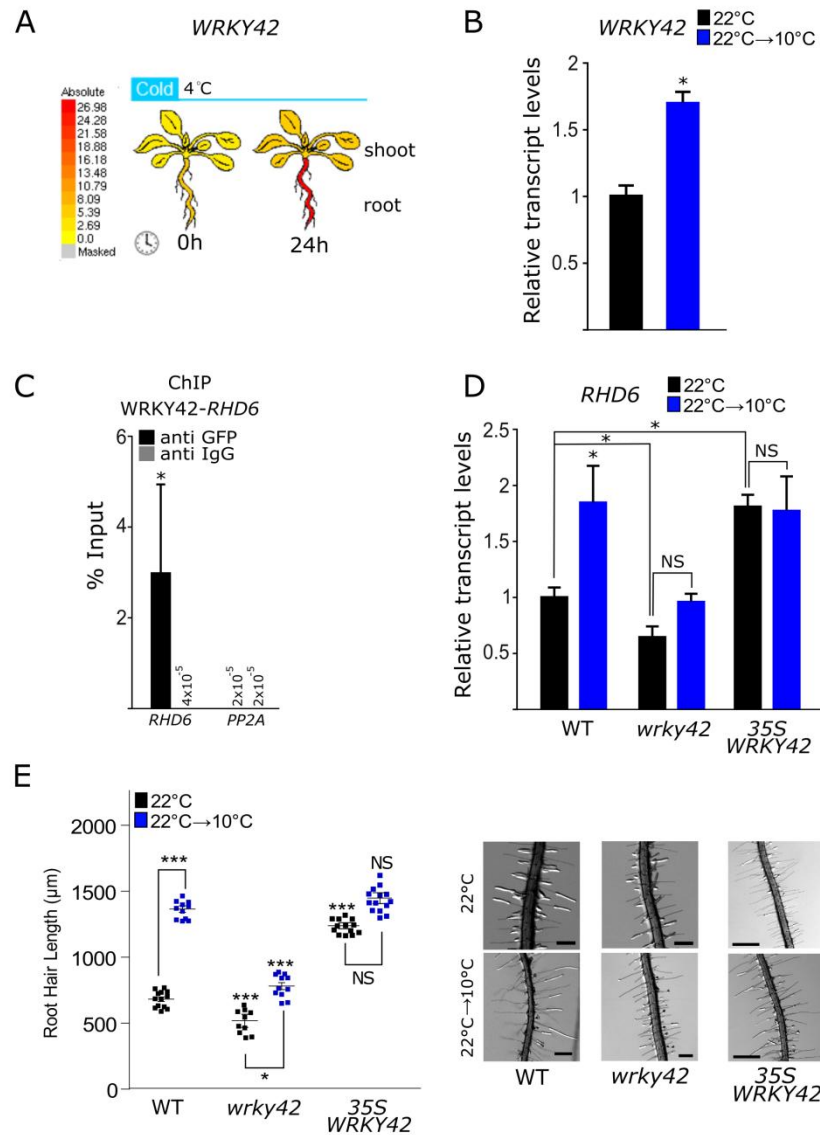

594

595

596 **Figure 3. The transcription factor WRKY42 directly regulates *RHD6* and participates in the response to**  
597 **cold**

598 **A.** Arabidopsis eFP Browser (37) plot representing the increase of *WRKY42* transcript levels in roots of  
599 seedlings treated for 24h at 4°C.

600 **B.** *WRKY42* transcript levels measured by RT-qPCR in roots of plants grown at 22°C treated or not for 24h  
601 at 10°C.

602 **C.** Chromatin Immunoprecipitation (ChIP)-qPCR assay revealing regulation by *WRKY42* of *RHD6* by direct  
603 recognition of its promoter region. Probes amplifying *PP2A* were used as a negative control of the exper-  
604 iment. Anti-IgG antibodies were used as a negative control for each pair of probes.

605 **D.** *RHD6* transcript levels measured by RT-qPCR in roots of WT plants vs. *wrky42* mutants and  
606 35S:*WRKY42*:*GFP* lines grown at 22°C treated or not for 24h at 10°C.

607 **E.** Quantification of RH length of plants WT, *wrky42* and 35S:*WRKY42*:*GFP* at 22°C and 10°C. Each point is  
608 the mean of the length of the 10 longest RHs identified in a single root. Representative images of each

609 genotype are shown on the right. Asterisks indicate significant differences between WT and the corre-  
610 sponding genotype at the same temperature (one way ANOVA followed by a Tukey-Kramer test;  
611 “\*”<0.05, “\*\*\*”<0.001, NS: no statistically significant).

612 In B, C and D, the error bar represents the SD of 3 biological replicates. The asterisk indicates that the  
613 difference is significant (t test  $p < 0.05$ , NS: no statistically significant).

614



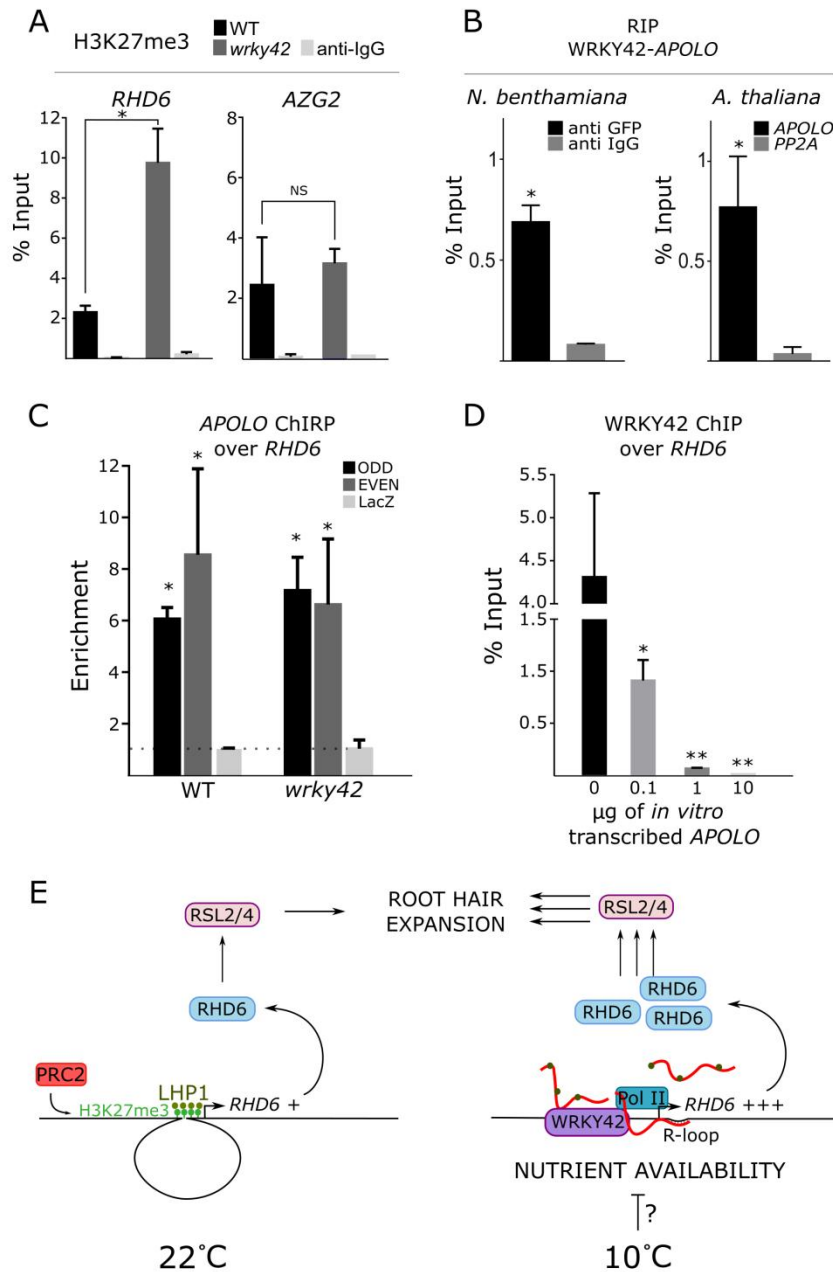

615  
 616 **Figure 4. The WRKY42-*APOLO* hub activates *RHD6* transcription in response to low temperatures, pro-**  
 617 **moting root hair expansion**

618 **A.** H3K27me3 deposition in WT vs. *wrky42* mutant 10-day-old seedlings grown at 23°C over *RHD6* and a  
 619 WRKY42-independent *APOLO* target (*AZG2*; (27)). An immunoprecipitation (ChIP-qPCR) was performed  
 620 using an anti-IgG antibody as a negative control.

621 **B.** *APOLO*-WRKY42 interaction *in vivo* demonstrated by RNA Immunoprecipitation (RIP)-qPCR in transi-  
 622 ently transformed tobacco leaves and stably transformed Arabidopsis plants. In tobacco, WRKY42:GFP  
 623 and *APOLO* were co-transformed under the control of the 35S constitutive promoter. In Arabidopsis,  
 624 35S:WRKY42:GFP transformed plants were used to detect the interaction with endogenous *APOLO*. Anti-

625 IgG antibodies were used as a negative control. The RNA *PP2A* was considered as a RIP negative control  
626 in Arabidopsis plants.

627 **C.** *APOLO* association to DNA of the *RHD6* locus by ChIRP-qPCR in WT and *wrky42* mutant plants. The  
628 background level was determined using a set of probes against LacZ RNA.

629 **D.** WRKY42 immunoprecipitation over *RHD6* with the addition of increasing concentrations of *in vitro*  
630 transcribed *APOLO* prior to cross-linking.

631 **E.** Proposed model for the action of *APOLO* in RH growth under low temperatures. In response to cold,  
632 *APOLO* levels increase, recognizing the *RHD6* locus by sequence complementarity. Then, LHP1 is decoyed  
633 away from chromatin and H3K27me3 deposition decreases in a process involving WRKY42 and leading to  
634 the opening of the *RHD6* promoter region. Additionally, *APOLO* and WRKY42 jointly activate *RHD6* tran-  
635 scription. *RHD6* activates the transcription of downstream TF genes *RSL2* and *4* promoting RH cell expan-  
636 sion.

637 In A, B, C and D, the error bar represents the SD of 3 biological replicates. The asterisk indicates that the  
638 difference is significant (t test “\*”<0.05, “\*\*\*”<0.01).

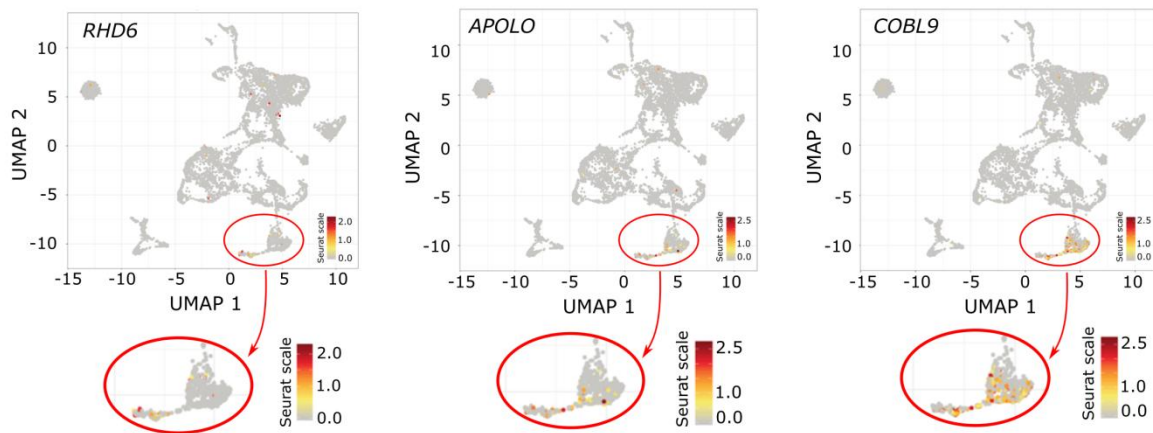

639  
640 **Supplementary Figure 1: *RHD6* and *APOLO* transcripts are enriched in root hair cells**  
641 Uniform Manifold Approximation and Projection (UMAP) clustering map of Arabidopsis root single cell  
642 RNA-seq ((31; <http://wanglab.sippe.ac.cn/rootatlas/>) data. *RHD6*, *APOLO* and the trichoblast cell marker  
643 *COBL9* are respectively indicated in red in each plot.  
644

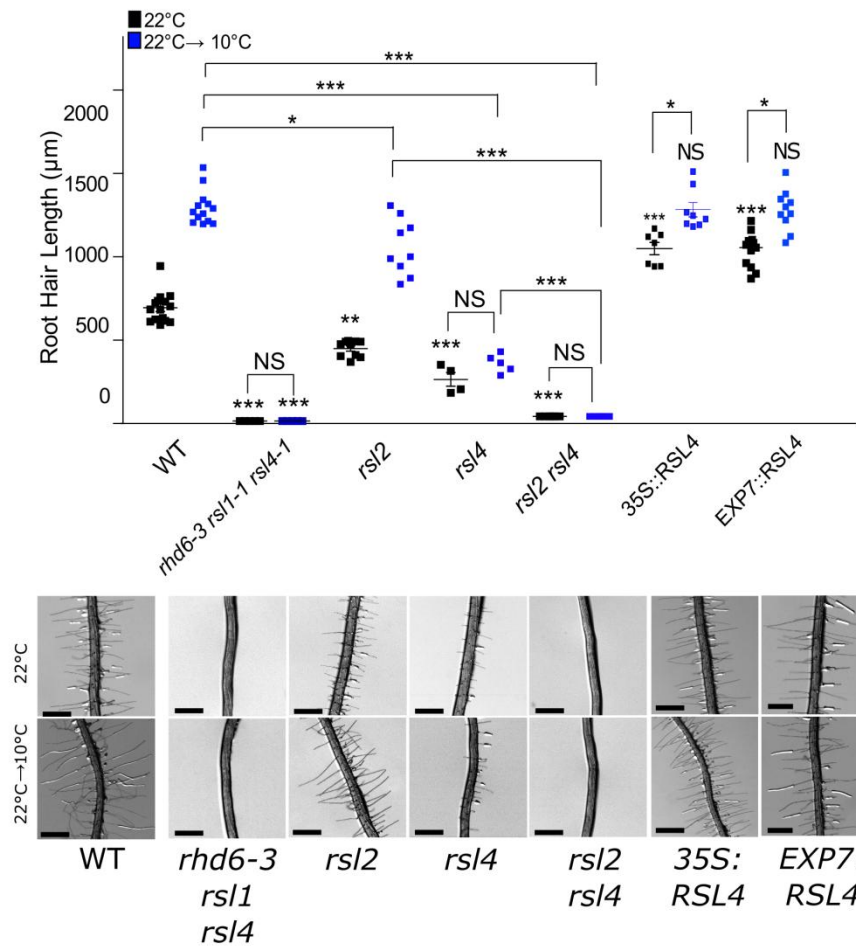

645  
646 **Supplementary Figure 2. Root hair expansion in response to cold is mediated by *RSL2* and *RSL4***  
647 Quantification of RH length of plants WT, *rhd6-3*, *rsl1/4*; *rsl2*; *rsl4*; *rsl2/4*; *35S::RSL4* and *pEXP7::RSL4* at  
648 22°C and 10°C. Each point is the mean of the length of the 10 longest RHs identified in a single root. Rep-  
649 resentative images of each genotype are shown below the graph. Asterisks indicate significant differ-  
650 ences between WT and the corresponding genotype at the same temperature (one way ANOVA followed  
651 by a Tukey-Kramer test; "\*" < 0.05, "\*\*\*" < 0.01, "\*\*\*\*" < 0.001, NS: no statistically significant), unless indicat-  
652 ed differently.

653

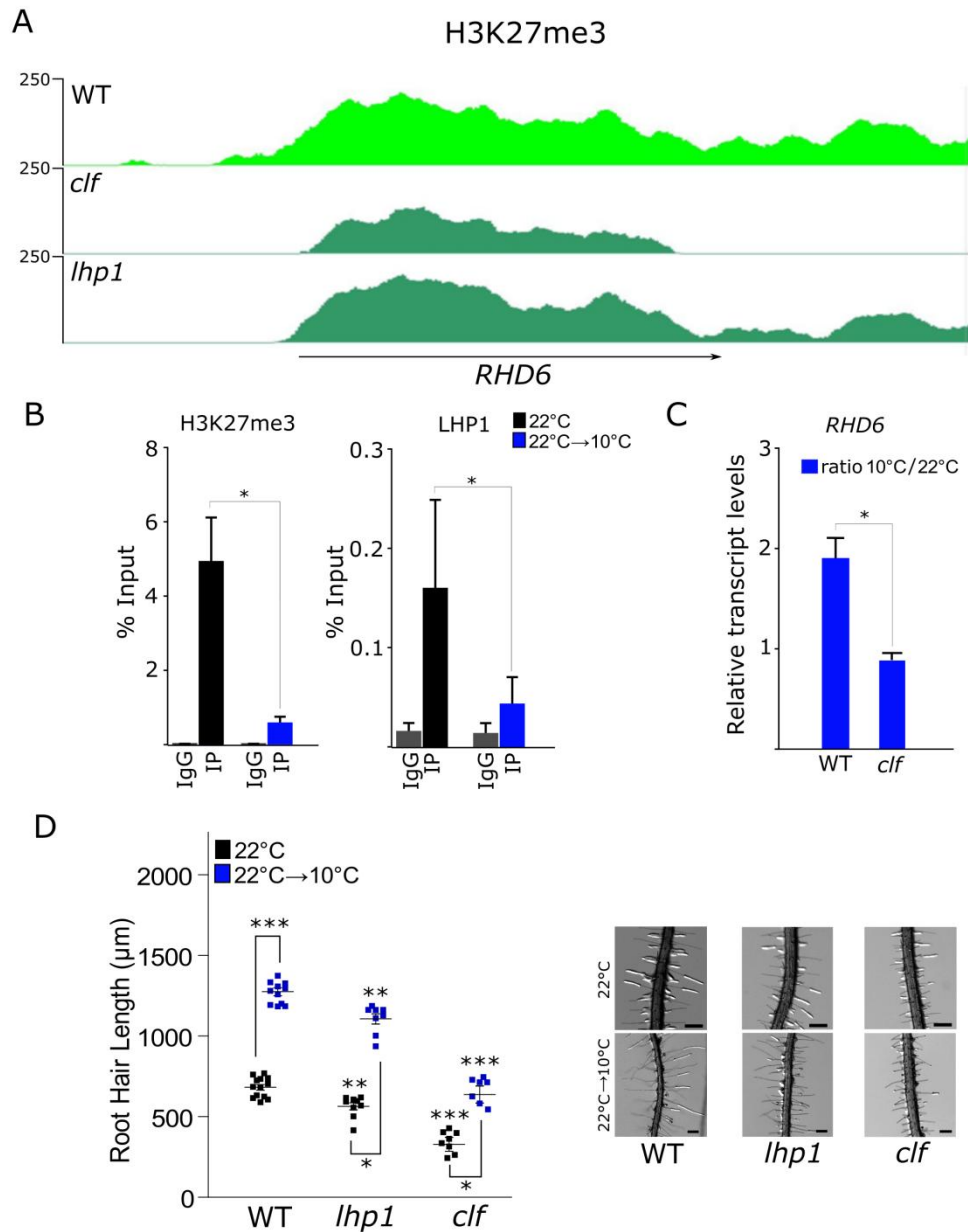

654  
655  
656  
657  
658  
659  
660  
661  
662  
663  
664  
665  
666

**Supplementary Figure 3: Induction of root hair elongation by low temperatures requires epigenetic Polycomb-mediated reprogramming**

**A.** H3K27me3 deposition across the *RHD6* locus in WT, *clf* and *lhp1* mutants, revealed by ChIP-seq from seedlings grown at 23°C (33).

**B.** H3K27me3 deposition measured by ChIP-qPCR over the *RHD6* locus in WT plants grown at 22°C treated or not for 24h at 10°C. The negative control was performed using an anti-IgG antibody.

**C.** *RHD6* transcript levels measured by RT-qPCR in roots of WT plants vs. *clf* mutants, expressed as the ratio between plants treated or not for 24h at 10°C over the mock plants grown at 22°C.

**D.** Quantification of RH length of plants WT, *lhp1* and *clf* at 22°C and 10°C. Each point is the mean of the length of the 10 longest RHs identified in a single root. Representative images of each genotype are shown on the right. Asterisks indicate significant differences between WT and the corresponding geno-

667 type at the same temperature (one way ANOVA followed by a Tukey-Kramer test; **\*\*\***<0.01,  
668 **\*\*\***<0.001).  
669 In B and C, the error bar represents the SD of 3 biological replicates. The asterisk indicates that the dif-  
670 ference is significant (t test  $p < 0.05$ ).

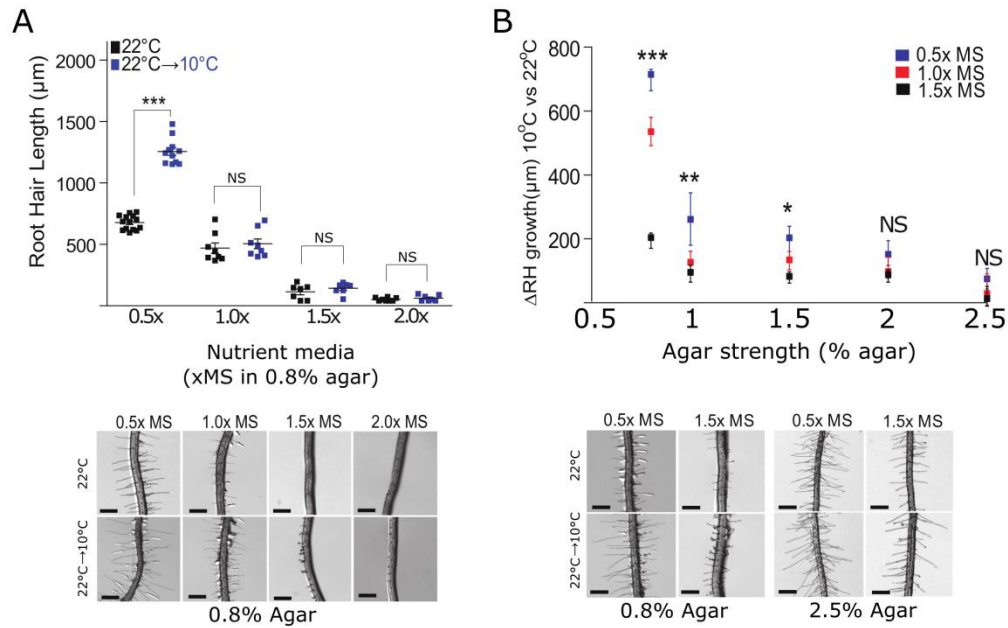

671  
672 **Supplementary Figure 4. Root hair expansion in response to cold seems to be related to nutrient avail-**  
673 **ability**

674 **A.** Quantification of RH length of WT plants at 22°C and 10°C at growing concentrations of Murashige and  
675 Skoog (MS) culture media. Each point is the mean of the length of the 10 longest RHs identified in a single  
676 root. Representative images of each genotype are shown on the right. Asterisks indicate significant  
677 differences between WT cultivated in the same growth conditions at different temperatures (one way  
678 ANOVA followed by a Tukey-Kramer test). NS stands for no statistically significant difference.

679 **B.** Quantification of RH length of WT plants expressed as the ratio between 10°C and 22°C at growing  
680 concentrations of MS culture media, for given concentrations of agar. Each point is the mean of the  
681 length of the 10 longest RHs identified in a single root. Representative images of each genotype are  
682 shown below the graph.

683 Asterisks indicate significant differences between the ratio of WT cultivated at different temperatures in  
684 different growth conditions (one way ANOVA followed by a Tukey-Kramer test; “\*”<0.05, “\*\*\*”<0.01,  
685 “\*\*\*\*”<0.001, NS: no statistically significant).

686 **LEGENDS TO SUPPLEMENTARY TABLES**

687

688 **Supplementary Table 1: *APOLO* targets related to root hair growth**

689 The list of *APOLO bona fide* targets was determined in (27). The search for root hairs-related genes was  
690 performed based on (9, 11, 13, 16). LHP1 binding and H3K27me3 deposition was investigated in previ-  
691 ously published datasets (33). W-boxes (TTGACY; (65)) present in the first 2500 bp upstream the ATG of  
692 each gene was searched manually. The position of the W-box is given only for *RHD6*, directly recognized  
693 by WRKY42 (**Figure 4B**).

694

695 **Supplementary Table 2: Root hair-related genes deregulated in 35S:*APOLO* seedlings**

696 The list of deregulated genes was determined by RNA-Seq (27). The search for root hairs-related genes  
697 was performed based on (9, 11, 13, 16). Genes are classified as directly (same as in **Supplementary Table**  
698 **1**) or indirectly regulated by *APOLO*. *RHD6*, *RSL2* and *RSL4* are highlighted in red.

699

700 **Supplementary Table 3: List of oligonucleotides used in this work**



## Supplementary Table 1

| <b>APOLO target</b> | <b>Gene name</b> | <b>LHP1 binding</b> | <b>H3K27me3 deposition</b> | <b>W-boxes in promoter</b> | <b>WRKY42 target (position)</b> |
|---------------------|------------------|---------------------|----------------------------|----------------------------|---------------------------------|
| AT1G66470           | <i>RHD6</i>      | YES                 | YES                        | 1                          | -2521                           |
| AT1G21310           | <i>EXT3</i>      | YES                 | YES                        | 4                          |                                 |
| AT1G23720           | <i>EXT15</i>     | YES                 | YES                        | 3                          |                                 |
| AT1G26250           | <i>EXT18</i>     | YES                 | YES                        | 0                          |                                 |
| AT1G62440           | <i>LRX2</i>      | YES                 | YES                        | 1                          |                                 |
| AT2G04780           | <i>FLA7</i>      | NO                  | NO                         | 2                          |                                 |
| AT2G24980           | <i>EXT6</i>      | weak                | weak                       | 2                          |                                 |
| AT2G26420           | <i>PIP5K3</i>    | NO                  | NO                         | 2                          |                                 |
| AT3G14310           | <i>PME3</i>      | NO                  | NO                         | 0                          |                                 |
| AT3G54580           | <i>EXT17</i>     | weak                | NO                         | 1                          |                                 |
| AT4G08400           | <i>EXT7</i>      | weak                | NO                         | 2                          |                                 |
| AT4G08410           | <i>EXT8</i>      | weak                | NO                         | 0                          |                                 |
| AT4G13340           | <i>LRX3</i>      | weak                | NO                         | 3                          |                                 |
| AT4G13390           | <i>EXT12</i>     | weak                | weak                       | 0                          |                                 |
| AT4G40090           | <i>AGP3</i>      | YES                 | YES                        | 2                          |                                 |
| AT5G06630           | <i>EXT9</i>      | YES                 | YES                        | 1                          |                                 |
| AT5G06640           | <i>EXT10</i>     | YES                 | YES                        | 0                          |                                 |

## Supplementary Table 2

|                                              | gene                                                    | name                                        | locus                  | sample 1             | sample 2  | status    | value 1  | value 2  | log2(FC) | test stat | p value  | q value  | significant? |     |
|----------------------------------------------|---------------------------------------------------------|---------------------------------------------|------------------------|----------------------|-----------|-----------|----------|----------|----------|-----------|----------|----------|--------------|-----|
| APOL0 direct targets (Supplementary Table 1) | AT1G66470                                               | <b>RHD6</b>                                 | chr1:24795213-24796988 | WT                   | 35S:APOLO | OK        | 0,376783 | 1,05922  | 1,4912   | 2,64116   | 0,00015  | 0,00097  | yes          |     |
|                                              | AT1G21310                                               | <b>EXT3</b>                                 | chr1:7453235-7455069   | WT                   | 35S:APOLO | OK        | 152,749  | 461,038  | 1,59372  | 6,83739   | 5,00E-05 | 0,00035  | yes          |     |
|                                              | AT1G23720                                               | <b>EXT15</b>                                | chr1:8388654-8391540   | WT                   | 35S:APOLO | OK        | 3,09641  | 19,245   | 2,63582  | 10,0477   | 0,00005  | 0,00035  | yes          |     |
|                                              | AT1G26250                                               | <b>EXT18</b>                                | chr1:9083837-9085464   | WT                   | 35S:APOLO | OK        | 3,22367  | 1,51056  | -1,09362 | -2,90259  | 0,00005  | 0,00035  | yes          |     |
|                                              | AT1G62440                                               | <b>LXR2</b>                                 | chr1:23111817-23115508 | WT                   | 35S:APOLO | OK        | 0,292088 | 2,59795  | 3,1529   | 6,79781   | 5,00E-05 | 0,00035  | yes          |     |
|                                              | AT2G04780                                               | <b>FLA7</b>                                 | chr2:1676741-1678455   | WT                   | 35S:APOLO | OK        | 7,18037  | 16,6557  | 1,21388  | 4,52231   | 0,00005  | 0,00035  | yes          |     |
|                                              | AT2G24980                                               | <b>EXT6</b>                                 | chr2:10622452-10624132 | WT                   | 35S:APOLO | OK        | 0,837653 | 6,96907  | 3,05654  | 7,82993   | 5,00E-05 | 0,00035  | yes          |     |
|                                              | AT2G26420                                               | <b>PIP5K3</b>                               | chr2:11239433-11242239 | WT                   | 35S:APOLO | OK        | 0,077305 | 0,34491  | 2,15759  | 2,67767   | 0,0003   | 0,00181  | yes          |     |
|                                              | AT3G14310                                               | <b>PME3</b>                                 | chr3:4771901-4775119   | WT                   | 35S:APOLO | OK        | 12,0768  | 25,3357  | 1,06894  | 4,63885   | 0,00005  | 0,00035  | yes          |     |
|                                              | AT3G54580                                               | <b>EXT17</b>                                | chr3:2020687-20203782  | WT                   | 35S:APOLO | OK        | 2,80301  | 22,185   | 2,98453  | 11,514    | 5,00E-05 | 0,00035  | yes          |     |
|                                              | AT4G08400                                               | <b>EXT7</b>                                 | chr4:5323799-5325341   | WT                   | 35S:APOLO | OK        | 0,166086 | 2,09646  | 3,65795  | 5,75847   | 5,00E-05 | 0,00035  | yes          |     |
|                                              | AT4G08410                                               | <b>EXT8</b>                                 | chr4:5339385-5341209   | WT                   | 35S:APOLO | OK        | 0,242031 | 2,59029  | 3,41985  | 6,63579   | 5,00E-05 | 0,00035  | yes          |     |
|                                              | AT4G13340                                               | <b>LXR3</b>                                 | chr4:7758609-7761159   | WT                   | 35S:APOLO | OK        | 61,2495  | 139,492  | 1,18741  | 5,4       | 5,00E-05 | 0,00035  | yes          |     |
|                                              | AT4G13390                                               | <b>EXT12</b>                                | chr4:7783802-7785332   | WT                   | 35S:APOLO | OK        | 1,28902  | 9,4516   | 2,87429  | 7,90266   | 5,00E-05 | 0,00035  | yes          |     |
|                                              | AT4G40090                                               | <b>AGP3</b>                                 | chr4:18580837-18581585 | WT                   | 35S:APOLO | OK        | 0,465013 | 6,11837  | 3,71781  | 6,1024    | 0,00005  | 0,00035  | yes          |     |
|                                              | AT5G06630                                               | <b>EXT9</b>                                 | chr5:2036360-2037843   | WT                   | 35S:APOLO | OK        | 0,47843  | 4,28202  | 3,16191  | 6,69628   | 5,00E-05 | 0,00035  | yes          |     |
|                                              | AT5G06640                                               | <b>EXT10</b>                                | chr5:2039858-2041928   | WT                   | 35S:APOLO | OK        | 0,704936 | 6,53659  | 3,21297  | 8,39508   | 5,00E-05 | 0,00035  | yes          |     |
|                                              | RH-related genes NOT identified as direct APOL0 targets | AT1G02900                                   | <b>RALF1</b>           | chr1:653764-654343   | WT        | 35S:APOLO | OK       | 6,43265  | 11,7847  | 0,87343   | 2,3996   | 0,0001   | 0,00067      | yes |
|                                              |                                                         | AT1G12040                                   | <b>LXR1</b>            | chr1:4070123-4072567 | WT        | 35S:APOLO | OK       | 0,254515 | 2,57012  | 3,33601   | 6,95711  | 5,00E-05 | 0,00035      | yes |
|                                              |                                                         | AT1G12560                                   | <b>EXPA7</b>           | chr1:4276518-4277899 | WT        | 35S:APOLO | OK       | 0,373865 | 2,37379  | 2,6666    | 4,34024  | 5,00E-05 | 0,00035      | yes |
| AT1G12950                                    |                                                         | <b>RSH2</b>                                 | chr1:4419769-4422638   | WT                   | 35S:APOLO | OK        | 0,312439 | 1,50467  | 2,2678   | 4,34933   | 5,00E-05 | 0,00035  | yes          |     |
| AT1G16440                                    |                                                         | <b>RSH3</b>                                 | chr1:5615814-5617672   | WT                   | 35S:APOLO | OK        | 0,16653  | 0,405508 | 1,28395  | 1,77649   | 0,00455  | 0,01897  | yes          |     |
| AT1G27740                                    |                                                         | <b>RSL4</b>                                 | chr1:9654687-9656809   | WT                   | 35S:APOLO | OK        | 0,105364 | 0,682308 | 2,69504  | 3,06432   | 0,0005   | 0,00284  | yes          |     |
| AT1G32640                                    |                                                         | <b>MYC2</b>                                 | chr1:1179809-11800988  | WT                   | 35S:APOLO | OK        | 22,203   | 52,6239  | 1,24496  | 5,66997   | 5,00E-05 | 0,00035  | yes          |     |
| AT2G35150                                    |                                                         | <b>PHI-1-like</b>                           | chr2:14817046-14818211 | WT                   | 35S:APOLO | OK        | 0,264466 | 1,09189  | 2,04567  | 3,08494   | 5,00E-05 | 0,00035  | yes          |     |
| AT1G54970                                    |                                                         | <b>PRP1</b>                                 | chr1:20504999-20506488 | WT                   | 35S:APOLO | OK        | 1,07342  | 8,36667  | 2,96244  | 7,31633   | 5,00E-05 | 0,00035  | yes          |     |
| AT1G55330                                    |                                                         | <b>AGP21</b>                                | chr1:20648464-20648891 | WT                   | 35S:APOLO | OK        | 36,0237  | 97,1117  | 1,4307   | 5,34932   | 5,00E-05 | 0,00035  | yes          |     |
| AT1G63450                                    |                                                         | <b>RHS8</b>                                 | chr1:23531408-23534569 | WT                   | 35S:APOLO | OK        | 0,03899  | 0,331918 | 3,08967  | 3,72534   | 5,00E-05 | 0,00035  | yes          |     |
| AT1G70460                                    |                                                         | <b>PERK13</b>                               | chr1:26555845-26559284 | WT                   | 35S:APOLO | OK        | 0,258225 | 1,21635  | 2,23585  | 4,60468   | 5,00E-05 | 0,00035  | yes          |     |
| AT2G25260                                    |                                                         | <b>HPAT2</b>                                | chr2:10755523-10757772 | WT                   | 35S:APOLO | OK        | 0,529251 | 1,33354  | 1,33324  | 2,44251   | 5,00E-05 | 0,00035  | yes          |     |
| AT2G43150                                    |                                                         | <b>EXT21</b>                                | chr2:17945769-17947032 | WT                   | 35S:APOLO | OK        | 52,0807  | 114,204  | 1,1328   | 5,20396   | 5,00E-05 | 0,00035  | yes          |     |
| AT2G47540                                    |                                                         | <b>SHV2</b>                                 | chr2:19505859-19506598 | WT                   | 35S:APOLO | OK        | 1,0193   | 4,80441  | 2,23678  | 4,04873   | 5,00E-05 | 0,00035  | yes          |     |
| AT3G07340                                    |                                                         | <b>bHLH62 TF</b>                            | chr3:2340898-2343470   | WT                   | 35S:APOLO | OK        | 3,61588  | 7,57866  | 1,06759  | 3,73419   | 5,00E-05 | 0,00035  | yes          |     |
| AT3G10710                                    |                                                         | <b>RHS12</b>                                | chr3:3352288-3354237   | WT                   | 35S:APOLO | OK        | 0,11403  | 1,03108  | 3,17667  | 4,47911   | 5,00E-05 | 0,00035  | yes          |     |
| AT3G21180                                    |                                                         | <b>ACA9</b>                                 | chr3:742518-7432200    | WT                   | 35S:APOLO | OK        | 0,058342 | 0,415952 | 2,83382  | 4,24417   | 5,00E-05 | 0,00035  | yes          |     |
| AT3G28550                                    |                                                         | <b>EXT16</b>                                | chr3:10688322-10703976 | WT                   | 35S:APOLO | OK        | 3,33615  | 28,0079  | 3,06958  | 5,7735    | 5,00E-05 | 0,00035  | yes          |     |
| AT3G43960                                    |                                                         | <b>RDL3</b>                                 | chr3:15774054-15775657 | WT                   | 35S:APOLO | OK        | 1,63093  | 3,72675  | 1,19223  | 3,00585   | 5,00E-05 | 0,00035  | yes          |     |
| AT3G48340                                    |                                                         | <b>CEP2</b>                                 | chr3:17897738-17899208 | WT                   | 35S:APOLO | OK        | 1,69325  | 11,8683  | 2,80925  | 7,74503   | 5,00E-05 | 0,00035  | yes          |     |
| AT3G54580                                    |                                                         | <b>EXT17</b>                                | chr3:2020687-20203782  | WT                   | 35S:APOLO | OK        | 2,80301  | 22,185   | 2,98453  | 11,514    | 5,00E-05 | 0,00035  | yes          |     |
| AT3G60330                                    |                                                         | <b>HA7</b>                                  | chr3:22297406-22303673 | WT                   | 35S:APOLO | OK        | 0,75475  | 1,83265  | 1,27986  | 3,54359   | 5,00E-05 | 0,00035  | yes          |     |
| AT3G62680                                    |                                                         | <b>PRP3</b>                                 | chr3:23182721-23183994 | WT                   | 35S:APOLO | OK        | 1,90231  | 17,1835  | 3,1752   | 9,02884   | 5,00E-05 | 0,00035  | yes          |     |
| AT4G02270                                    |                                                         | <b>RHS13</b>                                | chr4:992174-993038     | WT                   | 35S:APOLO | OK        | 0,956108 | 7,16393  | 2,90551  | 5,80735   | 5,00E-05 | 0,00035  | yes          |     |
| AT4G17215                                    |                                                         | <b>Pollen Ole e 1 allergen and extensin</b> | chr4:9655836-9656577   | WT                   | 35S:APOLO | OK        | 1,17841  | 4,76508  | 2,01566  | 3,84981   | 5,00E-05 | 0,00035  | yes          |     |
| AT4G22080                                    |                                                         | <b>RHS14</b>                                | chr4:11700554-11702666 | WT                   | 35S:APOLO | OK        | 0,059309 | 0,757044 | 3,67406  | 3,68273   | 0,00025  | 0,00154  | yes          |     |
| AT4G25400                                    |                                                         | <b>bHLH TF</b>                              | chr4:12981294-12982468 | WT                   | 35S:APOLO | OK        | 1,35187  | 4,32603  | 1,67809  | 3,18257   | 5,00E-05 | 0,00035  | yes          |     |
| AT4G29180                                    |                                                         | <b>RHS16</b>                                | chr4:14385592-14389689 | WT                   | 35S:APOLO | OK        | 0,099263 | 0,521194 | 2,39249  | 3,82728   | 5,00E-05 | 0,00035  | yes          |     |
| AT4G29930                                    |                                                         | <b>bHLH TF</b>                              | chr4:14644008-14647591 | WT                   | 35S:APOLO | OK        | 2,30654  | 7,32455  | 1,66701  | 4,31108   | 5,00E-05 | 0,00035  | yes          |     |
| AT4G33880                                    |                                                         | <b>RSL2</b>                                 | chr4:16239362-16241137 | WT                   | 35S:APOLO | OK        | 0,038579 | 0,306499 | 2,99001  | 2,43441   | 0,0083   | 0,03137  | yes          |     |
| AT4G36930                                    |                                                         | <b>SPT</b>                                  | chr4:17414126-17416294 | WT                   | 35S:APOLO | OK        | 1,36121  | 2,40537  | 0,82137  | 2,05934   | 0,00055  | 0,00309  | yes          |     |
| AT5G05500                                    |                                                         | <b>MOP10</b>                                | chr5:1629666-1630396   | WT                   | 35S:APOLO | OK        | 0,56784  | 5,15021  | 3,18108  | 5,39453   | 5,00E-05 | 0,00035  | yes          |     |
| AT5G19560                                    |                                                         | <b>ROPGEF10</b>                             | chr5:6603290-6606448   | WT                   | 35S:APOLO | OK        | 0,058391 | 0,406499 | 2,79944  | 2,91293   | 0,0004   | 0,00233  | yes          |     |
| AT5G22410                                    |                                                         | <b>RHS18</b>                                | chr5:7426313-7427964   | WT                   | 35S:APOLO | OK        | 0,342718 | 3,78832  | 3,46647  | 6,35329   | 5,00E-05 | 0,00035  | yes          |     |
| AT5G35190                                    |                                                         | <b>EXT13</b>                                | chr5:13434180-13435167 | WT                   | 35S:APOLO | OK        | 1,52769  | 15,7388  | 3,3649   | 8,58919   | 5,00E-05 | 0,00035  | yes          |     |
| AT5G41315                                    |                                                         | <b>GL3</b>                                  | chr5:16529454-16532879 | WT                   | 35S:APOLO | OK        | 0,235867 | 0,44781  | 0,92491  | 1,51906   | 0,0112   | 0,04019  | yes          |     |
| AT5G51060                                    | <b>RHD2</b>                                             | chr5:20752999-20762431                      | WT                     | 35S:APOLO            | OK        | 0,213913  | 1,38566  | 2,69548  | 3,1665   | 0,0001    | 0,00067  | yes      |              |     |
| AT5G51790                                    | <b>bHLH120 TF</b>                                       | chr5:21039510-21041446                      | WT                     | 35S:APOLO            | OK        | 2,80331   | 7,68882  | 1,45563  | 2,87659  | 5,00E-05  | 0,00035  | yes      |              |     |
| AT5G54380                                    | <b>THE1</b>                                             | chr5:22077059-22080338                      | WT                     | 35S:APOLO            | OK        | 19,729    | 40,4626  | 1,03627  | 4,68266  | 5,00E-05  | 0,00035  | yes      |              |     |
| AT5G58010                                    | <b>LRL3</b>                                             | chr5:23483544-23484889                      | WT                     | 35S:APOLO            | OK        | 0,163107  | 1,32569  | 3,02286  | 3,78898  | 5,00E-05  | 0,00035  | yes      |              |     |
| AT5G67400                                    | <b>RHS19</b>                                            | chr5:26894855-26896488                      | WT                     | 35S:APOLO            | OK        | 0,319731  | 2,96103  | 3,21117  | 5,60471  | 5,00E-05  | 0,00035  | yes      |              |     |

## Supplementary Table 3

|                                    | 3C-qPCR         |                            | Experiment     |
|------------------------------------|-----------------|----------------------------|----------------|
| AT1G66470<br><i>RHD6</i>           | F               | TCCCGATTCTTCCCTTAAAAA      | 3C             |
|                                    | R               | AAAGCAAACCTTGGCTGCTA       |                |
|                                    | F               | AATGACCATCCCAACGAGAC       | ChIRP, RT-qPCR |
|                                    | R               | CATAAGCTGCATCTGGCTGA       |                |
|                                    | F               | GGATTAGAAAGACCAGCTGCTTTAG  | ChIP           |
|                                    | R               | CCAGTTTGTGAACGACGACA       |                |
| AT2G34655<br><i>APOLO</i>          | F               | CTTCGAGGGCGCTAAACAATC      | RIP, RT-qPCR   |
|                                    | R               | ACAGCGGTGCCACCTATTAC       |                |
| AT5G50300<br><i>AZG2</i>           | F               | GGGAGTTGCAAAATGGCTTA       | ChIP           |
|                                    | R               | CCGACCATGTGAAAAATTCC       |                |
| AT4G04450<br><i>WRKY42</i>         | F               | CCGCTAAACGCTGGTGAGA        | RT-qPCR        |
|                                    | R               | CGGCAAAGTTGGGATTGG         |                |
|                                    | SALK_049063_LP2 | AAGCACGCTTCGATATCTGAG      | genotyping     |
|                                    | SALK_049063_RP2 | AGTTGCGACAATCAATGGATC      |                |
|                                    | SALK_049063_LP4 | TTTGTGCGTCTGTTACGTACG      |                |
|                                    | SALK_049063_RP4 | GTACTTGCTTGCGAACAGGAC      |                |
|                                    | F               | CACCATGTTTCGTTTTCCGGTAAGTC | cloning        |
|                                    | R               | TTGCCTATTGTCAACGTTGCTC     |                |
| AT1G13320<br><i>Housekeeping 1</i> | F               | TAACGTGGCCAAAATGATGC       | RIP, RT-qPCR   |
|                                    | R               | GTTCTCCACAACCGCTTGGT       |                |

| ChIRP 3'BIO probes |                       |
|--------------------|-----------------------|
| ODD probes         |                       |
| number             | sequence              |
| APOLO 1            | aaccagccaatgaacagatg  |
| APOLO 3            | gacaagtcacactacactc   |
| APOLO 5            | agttccaaggaatccatacc  |
| APOLO 7            | gacagcgggtgccacattata |
| APOLO 9            | ttacaacaagccactccgta  |
| APOLO 11           | accaaaacaaccaaatttt   |
| APOLO 13           | ccttacaacagagcaaagt   |
| APOLO 15           | ggaagcaaagcccaaaggaa  |
| APOLO 17           | caagtaaccccagaaaacta  |
| APOLO 19           | gattccgggtgaatacaagg  |

| EVEN probes |                       |
|-------------|-----------------------|
| number      | sequence              |
| APOLO 2     | gattgttagcgcctcgaag   |
| APOLO 4     | cgagaagaactaggccaaag  |
| APOLO 6     | tgaagactacctatagata   |
| APOLO 8     | acaaggaactccaacaaaa   |
| APOLO 10    | caacatctcgtcaaccacat  |
| APOLO 12    | cgaaactaaaacaagaagc   |
| APOLO 14    | ggaaataacaaggcaaaaca  |
| APOLO 16    | ccgacgattaaaaggataat  |
| APOLO 18    | gaaatacaaaagccggcggtt |
| APOLO 20    | tcgtctgaaagttattata   |

| EVEN LacZ probes |                       |
|------------------|-----------------------|
| number           | sequence              |
| LacZ 1           | ccagtgaatccgtaatcatg  |
| LacZ 5           | aatgtgagcggagtaacaacc |
| LacZ 7           | aataattcgcgtctggcctt  |
| LacZ 9           | aattcagacggcaaacgact  |
| LacZ 11          | atcttcagataactgccgt   |
| LacZ 13          | gctgatttgttagtcgggt   |
| LacZ 15          | aactgttaccgtaggtagt   |
| LacZ 17          | tttcgacgttcagacgtagt  |
| LacZ 19          | accattttcaatccgcacct  |
| LacZ 21          | ttcatcagcaggatctctg   |
